# Supplementary material
Source: ML conference proceedings conference paper supplement (https://openreview.net/forum?id=1qFnxhdbxg)
Supplement: supplementary_material [file attachment]

# Appendix for “Energy Discrepancies: A Score-Independent Loss for Energy-Based Models”

## Contents

|          |                                                                                           |           |
|----------|-------------------------------------------------------------------------------------------|-----------|
| <b>A</b> | <b>Abstract Proofs and Derivations</b>                                                    | <b>14</b> |
| A.1      | Proof of the Non-Parametric Estimation Theorem 1 . . . . .                                | 14        |
| A.2      | Equivalence of Energy Discrepancy for Brownian Motion and Ornstein-Uhlenbeck Processes .  | 16        |
| A.3      | Interpolation between Score-Matching and Maximum-Likelihood Estimation . . . . .          | 17        |
| A.4      | Representing ED as multi-scale SM for general Diffusion Processes . . . . .               | 20        |
| A.5      | Connections of Energy Discrepancy with Contrastive Divergence . . . . .                   | 22        |
| A.6      | Derivation of Energy Discrepancy from KL Contractions . . . . .                           | 23        |
| <b>B</b> | <b>Aspects of Training EBMs with Energy Discrepancy</b>                                   | <b>23</b> |
| B.1      | Conceptual Understanding of the $w$ -Stabilisation . . . . .                              | 23        |
| B.2      | Approximation of Energy Discrepancy based on general Ito Diffusions . . . . .             | 26        |
| B.3      | Energy Discrepancy on the Discrete Space $\{0, 1\}^d$ . . . . .                           | 27        |
| <b>C</b> | <b>Latent Space Energy-Based Prior Models</b>                                             | <b>27</b> |
| C.1      | A Brief Review of LEBMs . . . . .                                                         | 27        |
| C.2      | Langevin Sampling, Reconstruction, and Generation . . . . .                               | 29        |
| C.3      | Experimental Details of LEBMs . . . . .                                                   | 29        |
| <b>D</b> | <b>Additional Experimental Results</b>                                                    | <b>30</b> |
| D.1      | Experimental Setup for Figure 1 (Healing the nearsightedness of score-matching) . . . . . | 30        |
| D.2      | Experimental Setup for Figure 2 (Understanding the $w$ -stabilisation) . . . . .          | 31        |
| D.3      | Additional Density Estimation Results . . . . .                                           | 31        |
| D.4      | Additional Image Modelling Results . . . . .                                              | 33        |
| D.5      | Qualitative Results on the Effect of $t$ , $M$ , and $w$ . . . . .                        | 33        |

## A Abstract Proofs and Derivations

### A.1 Proof of the Non-Parametric Estimation Theorem 1

In this subsection we give a formal proof for the uniqueness of minima of  $\text{ED}_q(p_{\text{data}}, U)$  as a functional in the energy function  $U$ . We first reiterate the theorem as stated in the paper:

**Theorem 1.** *Let  $p_{\text{data}}$  be a positive probability density on  $(\mathcal{X}, d\mathbf{x})$ . Under mild technical assumptions, the energy discrepancy  $\text{ED}_q$  is functionally convex in  $U$  and has a unique global minimiser  $U^* = \arg \min \text{ED}_q(p_{\text{data}}, U)$  with  $p_{\text{data}} \propto \exp(-U^*)$ .*

For this theorem we need to make mild additional assumptions on the conditional distribution  $q$  and on the optimisation domain to guarantee uniqueness. Firstly, we require the energy-based distribution to be normalisable which implies that  $\exp(-U) \in L^1(\mathcal{X}, d\mathbf{x})$ . For the existence and uniqueness of minimisers we have to constrain the space of energy functions since  $\text{ED}_q(p_{\text{data}}, U) = \text{ED}_q(p_{\text{data}}, U + c)$  for any constant  $c \in \mathbb{R}$ . Hence, we restrict the optimisation domain to functions  $U$  that satisfy  $\min_{\mathbf{x} \in \mathcal{X}} U(\mathbf{x}) = 0$ . The sufficient condition for  $q$  is that  $\mathbf{x}$  can not be fully recovered from  $\mathbf{y} \sim q(\mathbf{y}|\mathbf{x})$  even if  $p_{\text{data}}(\mathbf{x})$  is known, i.e., for every  $\mathbf{x} \in \mathcal{X}$  and  $\mathbf{y} \sim q(\mathbf{y}|\mathbf{x})$ ,  $\text{Var}(\mathbf{z}|\mathbf{y}) > 0$ . Such a perturbation may also be deterministic. For image data, for example,  $\mathbf{y}$  can be defined as a

maxed-pooled version of the image which always takes information from the image. We summarise these assumptions as follows:

**Assumption 1.** For every  $\mathbf{y} \in \mathcal{X}$ , we define the recovery probability density

$$p_{\text{data}}(\mathbf{z}|\mathbf{y}) = \frac{q(\mathbf{y}|\mathbf{z})p_{\text{data}}(\mathbf{z})}{\int q(\mathbf{y}|\mathbf{z}')p_{\text{data}}(\mathbf{z}')d\mathbf{z}'}.$$

Furthermore, we define the optimisation domain

$$\mathcal{G} := \left\{ U : \mathcal{X} \mapsto \mathbb{R} \text{ such that } \exp(-U) \in L^1(\mathcal{X}, d\mathbf{x}), U \in L^1(p_{\text{data}}), \text{ and } \min_{\mathbf{x} \in \mathcal{X}} U(\mathbf{x}) = 0 \right\}$$

We then make the following assumptions on  $q$  and  $U$ :

1. For every  $\mathbf{x} \in \mathcal{X}$  and  $\mathbf{y} \sim q(\cdot|\mathbf{x})$  it holds that  $\text{Var}_{p_{\text{data}}(\mathbf{z}|\mathbf{y})}(\mathbf{z}) > 0$ .
2. There exists a  $U^* \in \mathcal{G}$  such that  $\exp(-U^*) \propto p_{\text{data}}$

Under Assumption 1,  $\text{ED}_q(p_{\text{data}}, U)$  has a unique global minimiser  $U^* = -\log p_{\text{data}} + c$  in  $\mathcal{G}$ . We prove this by computing the first and second variation of  $\text{ED}_q$ . Note that  $\mathcal{G}$  may not be a vector space in general since in some cases  $0 \notin \mathcal{G}$ . We will omit this technical issue in this discussion. We start from the following lemmata and then complete the proof of Theorem 1 in Corollary 1.

**Lemma 1.** Let  $h \in \mathcal{G}$  be arbitrary. The first variation of  $\text{ED}_q$  is given by

$$\left. \frac{d}{d\epsilon} \text{ED}_q(p_{\text{data}}, U + \epsilon h) \right|_{\epsilon=0} = \mathbb{E}_{p_{\text{data}}(\mathbf{x})}[h(\mathbf{x})] - \mathbb{E}_{p_{\text{data}}(\mathbf{x})} \mathbb{E}_{q(\mathbf{y}|\mathbf{x})} \mathbb{E}_{p_U(\mathbf{z}|\mathbf{y})}[h(\mathbf{z})] \quad (7)$$

where  $p_U(\mathbf{z}|\mathbf{y}) = \frac{q(\mathbf{y}|\mathbf{z}) \exp(-U(\mathbf{z}))}{\int q(\mathbf{y}|\mathbf{z}') \exp(-U(\mathbf{z}'))d\mathbf{z}'}$ .

*Proof.* We define the short-hand notation  $U_\epsilon := U + \epsilon h$ . The energy discrepancy at  $U_\epsilon$  reads

$$\text{ED}_q(p_{\text{data}}, U_\epsilon) = \mathbb{E}_{p_{\text{data}}(\mathbf{x})}[U_\epsilon(\mathbf{x})] + \mathbb{E}_{p_{\text{data}}(\mathbf{x})} \mathbb{E}_{q(\mathbf{y}|\mathbf{x})} \left[ \log \int q(\mathbf{y}|\mathbf{z}) \exp(-U_\epsilon(\mathbf{z}))d\mathbf{z} \right].$$

For the first functional derivative, we only need to calculate

$$\frac{d}{d\epsilon} \log \int q(\mathbf{y}|\mathbf{z}) \exp(-U_\epsilon(\mathbf{z}))d\mathbf{z} = \int \frac{-q(\mathbf{y}|\mathbf{z})h(\mathbf{z}) \exp(-U_\epsilon(\mathbf{z}))}{\int q(\mathbf{y}|\mathbf{z}') \exp(-U_\epsilon(\mathbf{z}'))d\mathbf{z}'}d\mathbf{z} = -\mathbb{E}_{p_{U_\epsilon}(\mathbf{z}|\mathbf{y})}[h(\mathbf{z})]. \quad (8)$$

Plugging this expression into  $\text{ED}_q(p_{\text{data}}, U_\epsilon)$  and setting  $\epsilon = 0$  yields the first variation of  $\text{ED}_q$ .  $\square$

**Lemma 2.** The second variation of  $\mathcal{F}$  is given by

$$\left. \frac{d^2}{d\epsilon^2} \text{ED}_q(p_{\text{data}}, U + \epsilon h) \right|_{\epsilon=0} = \mathbb{E}_{p_{\text{data}}(\mathbf{x})} \mathbb{E}_{q(\mathbf{y}|\mathbf{x})} \text{Var}_{p_U(\mathbf{z}|\mathbf{y})}[h(\mathbf{z})].$$

*Proof.* For the second order term, we have based on equation 8 and the quotient rule for derivatives:

$$\begin{aligned} & \frac{d^2}{d\epsilon^2} \log \int q(\mathbf{y}|\mathbf{z}) \exp(-U_\epsilon(\mathbf{z}))d\mathbf{z} \\ &= \frac{\int q(\mathbf{y}|\mathbf{z}) \exp(U_\epsilon(\mathbf{z})) h^2(\mathbf{z}) d\mathbf{z} \int q(\mathbf{y}|\mathbf{z}') \exp(-U_\epsilon(\mathbf{z}'))d\mathbf{z}'}{\left( \int q(\mathbf{y}|\mathbf{z}') \exp(-U_\epsilon(\mathbf{z}'))d\mathbf{z}' \right)^2} \\ & \quad - \frac{\int q(\mathbf{y}|\mathbf{z}) \exp(U_\epsilon(\mathbf{z})) h(\mathbf{z}) d\mathbf{z} \int q(\mathbf{y}|\mathbf{z}') \exp(-U_\epsilon(\mathbf{z}')) h(\mathbf{z}') d\mathbf{z}'}{\left( \int q(\mathbf{y}|\mathbf{z}') \exp(-U_\epsilon(\mathbf{z}'))d\mathbf{z}' \right)^2} \\ &= \mathbb{E}_{p_{U_\epsilon}(\mathbf{z}|\mathbf{y})}[h^2(\mathbf{z})] - \mathbb{E}_{p_{U_\epsilon}(\mathbf{z}|\mathbf{y})}[h(\mathbf{z})]^2 = \text{Var}_{p_{U_\epsilon}(\mathbf{z}|\mathbf{y})}[h(\mathbf{z})]. \end{aligned}$$

We obtain the desired result by interchanging the outer expectations with the derivatives in  $\epsilon$ .  $\square$

584 **Corollary 1.** Let  $c = \min_{\mathbf{x} \in \mathcal{X}} (-\log p_{\text{data}}(\mathbf{x}))$ . For  $U^* = -\log(p_{\text{data}}) - c \in \mathcal{G}$  it holds that

$$\begin{aligned} \left. \frac{d}{d\epsilon} \text{ED}_q(p_{\text{data}}, U^* + \epsilon h) \right|_{\epsilon=0} &= 0 \\ \left. \frac{d^2}{d\epsilon^2} \text{ED}_q(p_{\text{data}}, U^* + \epsilon h) \right|_{\epsilon=0} &> 0 \quad \text{for all } h, \end{aligned}$$

585 Furthermore,  $U^*$  is the unique global minimiser of  $\text{ED}_q(p_{\text{data}}, \cdot)$  in  $\mathcal{G}$ .

586 *Proof.* By definition, the variance is non-negative, i.e. for every  $h \in \mathcal{G}$ :

$$\left. \frac{d^2}{d\epsilon^2} \text{ED}_q(p_{\text{data}}, U + \epsilon h) \right|_{\epsilon=0} = \text{Var}_{p_{U^*}(\mathbf{z}|\mathbf{y})}[h(\mathbf{z})] \geq 0.$$

587 Consequently, the energy discrepancy is convex and an extremal point of  $\text{ED}_q(p_{\text{data}}, \cdot)$  is a global  
588 minimiser. We are left to show that the minimiser is obtained at  $U^*$  and unique. First of all, we have  
589 for  $U^*$ :

$$\begin{aligned} \mathbb{E}_{p_{U^*}(\mathbf{z}|\mathbf{y})}[h(\mathbf{z})] &= \int \frac{q(\mathbf{y}|\mathbf{z}) \exp(-U^*(\mathbf{z}))}{\int q(\mathbf{y}|\mathbf{z}') \exp(-U^*(\mathbf{z}')) d\mathbf{z}'} h(\mathbf{z}) d\mathbf{z} \\ &= \int \frac{q(\mathbf{y}|\mathbf{z}) p_{\text{data}}(\mathbf{z})}{\int q(\mathbf{y}|\mathbf{z}') p_{\text{data}}(\mathbf{z}') d\mathbf{z}'} h(\mathbf{z}) d\mathbf{z}. \end{aligned}$$

590 By applying the outer expectations we obtain

$$\begin{aligned} \mathbb{E}_{p_{\text{data}}(\mathbf{x})} \mathbb{E}_{q(\mathbf{y}|\mathbf{x})} \mathbb{E}_{p_{U^*}(\mathbf{z}|\mathbf{y})}[h(\mathbf{z})] &= \int \int p_{\text{data}}(\mathbf{x}) q(\mathbf{y}|\mathbf{x}) d\mathbf{x} \int \frac{q(\mathbf{y}|\mathbf{z}) p_{\text{data}}(\mathbf{z})}{\int q(\mathbf{y}|\mathbf{z}') p_{\text{data}}(\mathbf{z}') d\mathbf{z}'} h(\mathbf{z}) d\mathbf{y} d\mathbf{z} \\ &= \int \int q(\mathbf{y}|\mathbf{x}) p_{\text{data}}(\mathbf{z}) h(\mathbf{z}) d\mathbf{y} d\mathbf{z} \\ &= \mathbb{E}_{p_{\text{data}}(\mathbf{z})}[h(\mathbf{z})], \end{aligned}$$

591 where we used that the marginal distributions  $\int p_{\text{data}}(\mathbf{x}) q(\mathbf{y}|\mathbf{x}) d\mathbf{x}$  cancel out and the conditional  
592 probability density integrates to one. This implies

$$\left. \frac{d}{d\epsilon} \text{ED}_q(p_{\text{data}}, U^* + \epsilon h) \right|_{\epsilon=0} = \mathbb{E}_{p_{\text{data}}(\mathbf{z})}[h(\mathbf{z})] - \mathbb{E}_{p_{\text{data}}(\mathbf{z})}[h(\mathbf{z})] = 0.$$

593 for all  $h \in \mathcal{G}$ . We now show that

$$\left. \frac{d^2}{d\epsilon^2} \text{ED}_q(p_{\text{data}}, U^* + \epsilon h) \right|_{\epsilon=0} = \mathbb{E}_{p_{\text{data}}(\mathbf{x})} \mathbb{E}_{q(\mathbf{y}|\mathbf{x})} \text{Var}_{p_{\text{data}}(\mathbf{z}|\mathbf{y})}[h(\mathbf{z})] > 0.$$

594 Assume that the second variation was zero. Since the perturbed data distribution  $\int p_{\text{data}}(\mathbf{x}) q(\mathbf{y}|\mathbf{x}) d\mathbf{x}$   
595 is positive, the second variation at  $U^*$  is zero if and only if the conditional variance  
596  $\text{Var}_{p_{\text{data}}(\mathbf{z}|\mathbf{y})}[h(\mathbf{z})] = 0$ . Since  $U^* + \epsilon h \in \mathcal{G}$ , the function  $h$  can not be constant. By definition of the  
597 conditional variance,  $h(\mathbf{z})$  must then be a deterministic function of  $\mathbf{y} \sim \int q(\mathbf{y}|\mathbf{x}) p_{\text{data}}(\mathbf{x}) d\mathbf{x}$ . Since  
598  $h$  was arbitrary, there exists a measurable map  $g$  such that  $\mathbf{z} = g(\mathbf{y})$  and  $\text{Var}_{p_{\text{data}}(\mathbf{z}|\mathbf{y})}[\mathbf{z}] = 0$  which  
599 is a contradiction to Assumption 1. Consequently,  $U^*$  is the unique global minimiser of  $\text{ED}_q$  which  
600 completes the statement in Theorem 1.  $\square$

## 601 A.2 Equivalence of Energy Discrepancy for Brownian Motion and Ornstein-Uhlenbeck 602 Processes

603 In this subsection we show that an energy discrepancy based on an Ornstein-Uhlenbeck process is  
604 equivalent to the energy discrepancy based on a time-changed Brownian motion.

605 **Proposition 1.** Let  $q_t$  be the transition density for the Ornstein-Uhlenbeck process  $d\mathbf{x}_t = \alpha \mathbf{x}_t dt +$   
606  $\sqrt{\beta} d\mathbf{w}_t$  with standard Brownian motion  $\mathbf{w}_t$ , and let  $\gamma_t(\mathbf{y}|\mathbf{x}) \propto \exp(-\|\mathbf{y} - \mathbf{x}\|^2/2t)$  be the Gaussian  
607 transition density of Brownian motion. Then,

$$\text{ED}_{q_t}(p_{\text{data}}, U) = \text{ED}_{\gamma_{\sigma_{\alpha}^2(t)}}(p_{\text{data}}, U) - \alpha t$$

608 where  $\sigma_{\alpha}(t) = \sqrt{\frac{\beta}{2\alpha}(e^{2\alpha t} - 1)}$  and  $\sigma_0(t) = \sqrt{\beta t}$ .

609 *Proof.* At time  $t$ , the Ornstein-Uhlenbeck process has distribution

$$\mathbf{x}_t \stackrel{d}{=} e^{\alpha t} \mathbf{x}_0 + \sigma_\alpha(t) \boldsymbol{\xi}, \quad \boldsymbol{\xi} \sim \mathcal{N}(0, \mathbf{I}) \quad (9)$$

610 with  $\sigma_\alpha(t) = \sqrt{\frac{\beta}{2\alpha}(e^{2\alpha t} - 1)}$  and  $\sigma_0(t) = \sqrt{\beta t}$ . The Ornstein-Uhlenbeck process is variance  
 611 exploding for  $\alpha \geq 0$  and variance preserving for  $\alpha < 0$ . Based on (9), the transition density of  $\mathbf{x}_t$  is  
 612 given as

$$q_t(\mathbf{y}|\mathbf{x}) = \frac{1}{\sqrt{2\pi\sigma_\alpha(t)}^d} \exp\left(-\frac{\|\mathbf{y} - e^{\alpha t}\mathbf{x}\|^2}{2\sigma_\alpha^2(t)}\right)$$

613 Hence, we obtain via the change of variables  $\boldsymbol{\xi}' := (\mathbf{y} - e^{\alpha t}\mathbf{x})/\sigma_\alpha(t) \sim \mathcal{N}(0, \mathbf{I})$  for the contrastive  
 614 potential

$$\begin{aligned} U_t(\mathbf{y}) &= -\log \int q_t(\mathbf{y}|\mathbf{x}) \exp(-U(\mathbf{x})) d\mathbf{x} \\ &= -\log \int \gamma_1(\boldsymbol{\xi}') \exp(-U(e^{-\alpha t}(\mathbf{y} - \sigma_\alpha(t)\boldsymbol{\xi}')) d\boldsymbol{\xi}' - \alpha t. \end{aligned}$$

615 We now evaluate the contrastive potential at the forward process  $\mathbf{y} = \mathbf{x}_t$  which yields

$$\begin{aligned} U_t(\mathbf{x}_t) &= -\log \int \gamma_1(\boldsymbol{\xi}') \exp(-U(e^{-\alpha t}(e^{\alpha t}\mathbf{x}_0 + \sigma_\alpha(t)\boldsymbol{\xi} - \sigma_\alpha(t)\boldsymbol{\xi}')) d\boldsymbol{\xi}' - \alpha t \\ &= -\log \int \gamma_1(\boldsymbol{\xi}') \exp(-U(\mathbf{x}_0 + \sigma_{-\alpha}(t)\boldsymbol{\xi} - \sigma_{-\alpha}(t)\boldsymbol{\xi}')) d\boldsymbol{\xi}' - \alpha t \\ &= -\log \int \gamma_{\sigma_{-\alpha}^2(t)}(\mathbf{w}_{\sigma_{-\alpha}^2(t)} - \mathbf{x}) \exp(-U(\mathbf{x})) d\mathbf{x} - \alpha t \end{aligned}$$

616 where we used that  $e^{-\alpha t}\sigma_\alpha(t) = \sigma_{-\alpha}(t)$  in the second equality and the change of variables  $\mathbf{x} =$   
 617  $\mathbf{w}_{\sigma_{-\alpha}^2(t)} - \boldsymbol{\xi}'$  in the third equality. Hence, the energy discrepancy for the Ornstein-Uhlenbeck process  
 618 is equivalent to the energy discrepancy for Brownian motion with time parameter

$$\sigma_{-\alpha}(t) = \sqrt{\frac{\beta}{2\alpha}(1 - e^{-2\alpha t})}$$

619

□

620 Notice that for the variance-exploding process with  $\alpha > 0$  the contrasting particles have a finite  
 621 horizon since  $\sigma_{-\alpha}(t) \xrightarrow{t \rightarrow \infty} \sqrt{\frac{\beta}{2\alpha}} < \infty$ . Hence, the maximum-likelihood limit in Theorem 2 is only  
 622 achieved for the variance preserving process with  $\alpha < 0$  and for the critical case of Brownian motion  
 623 with  $\alpha = 0$ .

### 624 A.3 Interpolation between Score-Matching and Maximum-Likelihood Estimation

625 We first prove the result as stated in the Gaussian case. We then show how the result can be generalised  
 626 to arbitrary diffusions by using Ito calculus.

627 **Gaussian case** Denote the Gaussian density as

$$\gamma_t(\mathbf{y} - \mathbf{x}) := \frac{1}{\sqrt{2\pi t}^d} \exp\left(-\frac{\|\mathbf{y} - \mathbf{x}\|^2}{2t}\right).$$

628 and define the convolved distributions  $p_t := \gamma_t * p_{\text{data}}$  and  $\exp(-U_t) := \gamma_t * \exp(-U)$ .

629 **Proposition 2.** *The energy discrepancy is the multi noise-scale score-matching loss*

$$\text{ED}(p_{\text{data}}, U) = \int_0^t \mathbb{E}_{p_s(\mathbf{x}_s)} \left[ -\Delta U_s(\mathbf{x}_s) + \frac{1}{2} \|\nabla U_s(\mathbf{x}_s)\|^2 \right] ds$$



630 *Proof.* It is known that  $\gamma_t$  is the solution of the heat equation:

$$\partial_t \gamma_t(\mathbf{y} - \mathbf{x}) = \frac{1}{2} \Delta_{\mathbf{y}} \gamma_t(\mathbf{y} - \mathbf{x}).$$

631 Consequently, both,  $p_t$  and  $\exp(-U_t)$  satisfy the heat-equation because the integral commutes with  
 632 the differential operators. Based on the heat-equation we can derive the following non-linear partial  
 633 differential equation for the contrastive potential  $U_t$ :

$$\begin{aligned} \partial_t e^{-U_t(\mathbf{y})} &= \int \partial_t \gamma_t(\mathbf{y} - \mathbf{x}) e^{-U(\mathbf{x})} d\mathbf{x} \\ &= \frac{1}{2} \int \Delta_{\mathbf{y}} \gamma_t(\mathbf{y} - \mathbf{x}) e^{-U(\mathbf{x})} d\mathbf{x} \\ &= \frac{1}{2} \Delta_{\mathbf{y}} e^{-U_t(\mathbf{y})} \\ &= -\frac{1}{2} \nabla_{\mathbf{y}} \cdot \left( (\nabla_{\mathbf{y}} U_t(\mathbf{y})) e^{-U_t(\mathbf{y})} \right) \\ &= \left( \frac{1}{2} \|\nabla_{\mathbf{y}} U_t(\mathbf{y})\|^2 - \frac{1}{2} \Delta_{\mathbf{y}} U_t(\mathbf{y}) \right) e^{-U_t(\mathbf{y})} \end{aligned}$$

634 Since  $\partial_t e^{-U_t} = -e^{-U_t} \partial_t U_t$ , we get after cancellation of the exponentials:

$$\partial_t U_t(\mathbf{y}) = \frac{1}{2} \Delta_{\mathbf{y}} U_t(\mathbf{y}) - \frac{1}{2} \|\nabla_{\mathbf{y}} U_t(\mathbf{y})\|^2$$

635 The integral notation of the contrastive term in energy discrepancy takes the form

$$\mathbb{E}_{p_{\text{data}}(\mathbf{x})} \mathbb{E}_{\gamma_t(\mathbf{y}-\mathbf{x})} [U_t(\mathbf{y})] = \int U_t(\mathbf{y}) p_t(\mathbf{y}) d\mathbf{y}.$$

636 We now take a derivative of the energy discrepancy and find

$$\begin{aligned} \partial_t \text{ED}_{\gamma_t}(p_{\text{data}}, U) &= -\partial_t \int U_t(\mathbf{y}) p_t(\mathbf{y}) d\mathbf{y} \\ &= -\int (\partial_t U_t(\mathbf{y})) p_t(\mathbf{y}) d\mathbf{y} - \int U_t(\mathbf{y}) \partial_t p_t(\mathbf{y}) d\mathbf{y} \\ &= -\int (\partial_t U_t(\mathbf{y})) p_t(\mathbf{y}) d\mathbf{y} - \int U_t(\mathbf{y}) \frac{1}{2} \Delta_{\mathbf{y}} p_t(\mathbf{y}) d\mathbf{y} \\ &= -\int (\partial_t U_t(\mathbf{y})) p_t(\mathbf{y}) d\mathbf{y} - \int \frac{1}{2} (\Delta_{\mathbf{y}} U_t(\mathbf{y})) p_t(\mathbf{y}) d\mathbf{y} \end{aligned}$$

637 where we used integration by parts twice in the final equation to shift the differential operator from  $p_t$   
 638 to  $U_t$ . Now, plugging in the differential equation for  $U_t$  we find

$$\begin{aligned} \partial_t \text{ED}_{\gamma_t}(p_{\text{data}}, U) &= \int \left( -\frac{1}{2} \Delta_{\mathbf{y}} U_t(\mathbf{y}) + \frac{1}{2} \|\nabla_{\mathbf{y}} U_t(\mathbf{y})\|^2 - \frac{1}{2} \Delta_{\mathbf{y}} U_t(\mathbf{y}) \right) p_t(\mathbf{y}) d\mathbf{y} \\ &= \mathbb{E}_{p_{\text{data}}(\mathbf{x})} \mathbb{E}_{\gamma_t(\mathbf{y}-\mathbf{x})} \left[ -\Delta_{\mathbf{y}} U_t(\mathbf{y}) + \frac{1}{2} \|\nabla_{\mathbf{y}} U_t(\mathbf{y})\|^2 \right] \end{aligned}$$

639 Finally, we obtain energy discrepancy by integrating above expression:

$$\begin{aligned} \text{ED}_{\gamma_t}(p_{\text{data}}, U) &= \int_0^t \partial_s \text{ED}_{\gamma_s}(p_{\text{data}}, U) ds \\ &= \int_0^t \mathbb{E}_{p_{\text{data}}(\mathbf{x})} \mathbb{E}_{\gamma_s(\mathbf{y}-\mathbf{x})} \left[ -\Delta_{\mathbf{y}} U_s(\mathbf{y}) + \frac{1}{2} \|\nabla_{\mathbf{y}} U_s(\mathbf{y})\|^2 \right] ds \end{aligned}$$

640 This gives the desired integral representation in Proposition 2. □

641 **Proposition 3.** Let  $\gamma_t$  be the Gaussian transition density and  $p_{\text{ebm}} \propto \exp(-U)$  the energy-based  
 642 distribution. The energy discrepancy converges to a cross entropy loss at a linear rate in time

$$|\text{ED}_{\gamma_t}(p_{\text{data}}, U) + \mathbb{E}_{p_{\text{data}}(\mathbf{x})} [\log p_{\text{ebm}}(\mathbf{x})] - c(t)| \leq \frac{1}{2t} \mathbb{W}_2^2(p_{\text{data}}, p_{\text{ebm}})$$

643 where  $c(t)$  is a renormalising constant independent of  $U$ .

644 For the proof we employ the following lemma of Yihong Wu which was given in [Raginsky & Sason](#)  
645 (2013).

646 **Lemma 3.** *Let  $\gamma_t$  be the Gaussian transition density of a standard Brownian motion. Let  $\mu, \nu$  be*  
647 *probability distributions and denote  $\mu_t := \gamma_t * \mu$  and  $\nu_t := \gamma_t * \nu$ . The following information-transport*  
648 *inequality holds:*

$$\text{KL}(\mu_t \parallel \nu_t) \leq \frac{1}{2t} \mathbb{W}_2^2(\mu, \nu)$$

649 *Proof.* Let  $\pi$  be a probability density of  $(\mathbf{x}, \mathbf{x}')$  with marginal distributions  $\mu(\mathbf{x})$  and  $\nu(\mathbf{x}')$  (also  
650 called a coupling in optimal transport). We have

$$\begin{aligned} & \int \text{KL}(\gamma_t(\cdot - \mathbf{x}) \parallel \gamma_t(\cdot - \mathbf{x}')) \pi(\mathbf{x}, \mathbf{x}') d\mathbf{x} d\mathbf{x}' - \text{KL}(\mu_t \parallel \nu_t) \\ &= \int \text{KL}\left(\frac{\gamma_t(\mathbf{y} - \mathbf{x}) \pi(\mathbf{x}, \mathbf{x}')}{\mu_t(\mathbf{y})} \parallel \frac{\gamma_t(\mathbf{y} - \mathbf{x}') \pi(\mathbf{x}, \mathbf{x}')}{\nu_t(\mathbf{y})}\right) \mu_t(\mathbf{y}) d\mathbf{y} \geq 0 \end{aligned}$$

651 Hence, we find by rearranging the inequality

$$\text{KL}(\mu_t \parallel \nu_t) \leq \int \text{KL}(\gamma_t(\cdot - \mathbf{x}) \parallel \gamma_t(\cdot - \mathbf{x}')) \pi(\mathbf{x}, \mathbf{x}') d\mathbf{x} d\mathbf{x}'$$

652 The right hand side is the Kullback-Leibler divergence between Gaussians, so

$$\text{KL}(\gamma_t(\cdot - \mathbf{x}) \parallel \gamma_t(\cdot - \mathbf{x}')) = \frac{1}{2t} \|\mathbf{x} - \mathbf{x}'\|^2$$

653 Since the coupling was arbitrary, we can minimise over all couplings  $\pi$  of  $\mu$  and  $\nu$  which results in  
654 the Wasserstein-distance

$$\text{KL}(\mu_t \parallel \nu_t) \leq \min_{\pi \in \Pi(\mu, \nu)} \int \text{KL}(\gamma_t(\cdot - \mathbf{x}) \parallel \gamma_t(\cdot - \mathbf{x}')) \pi(\mathbf{x}, \mathbf{x}') d\mathbf{x} d\mathbf{x}' = \frac{1}{2t} \mathbb{W}_2^2(\mu, \nu)$$

655 where  $\Pi(\mu, \nu)$  denotes the set of all joint distributions with marginals  $\mu$  and  $\nu$ . □

656 The proof of Proposition 3 then follows:

657 *Proof.* Let  $\mu = p_{\text{data}}$  and  $\nu = p_{\text{ebm}}$ , denote the convolved distributions as  $p_{t, \text{data}}$  and  $p_{t, \text{ebm}}$ . Notice  
658 that for any  $\mathbf{x}, \mathbf{y} \in \mathbb{R}^d$

$$\log \frac{p_{t, \text{ebm}}(\mathbf{y})}{p_{\text{ebm}}(\mathbf{x})} = U(\mathbf{x}) - U_t(\mathbf{y})$$

659 since both models have the same normalising constant. We then have for arbitrary  $\mathbf{x}$

$$\begin{aligned} \text{KL}(p_{t, \text{data}} \parallel p_{t, \text{ebm}}) &= \int (\log p_{t, \text{data}}(\mathbf{y}) - \log p_{t, \text{ebm}}(\mathbf{y})) p_{t, \text{data}}(\mathbf{y}) d\mathbf{y} \\ &= \int \left( \log p_{t, \text{data}}(\mathbf{y}) - \log \frac{p_{t, \text{ebm}}(\mathbf{y})}{p_{\text{ebm}}(\mathbf{x})} - \log p_{\text{ebm}}(\mathbf{x}) \right) p_{t, \text{data}}(\mathbf{y}) d\mathbf{y} \\ &= \int (\log p_{t, \text{data}}(\mathbf{y}) + U_t(\mathbf{y}) - U(\mathbf{x})) p_{t, \text{data}}(\mathbf{y}) d\mathbf{y} - \log p_{\text{ebm}}(\mathbf{x}) \\ &= c(t) + \int U_t(\mathbf{y}) p_{t, \text{data}}(\mathbf{y}) d\mathbf{y} - U(\mathbf{x}) - \log p_{\text{ebm}}(\mathbf{x}) \end{aligned}$$

660 with  $U$  independent entropy term  $c(t) := \mathbb{E}_{p_{t, \text{data}}(\mathbf{y})} [\log p_{t, \text{data}}(\mathbf{y})]$ . Since  $\mathbf{x}$  was chosen arbitrarily,  
661 we can integrate with respect to  $p_{\text{data}}(\mathbf{x})$  and find

$$\begin{aligned} 0 &\leq \text{KL}(p_{t, \text{data}} \parallel p_{t, \text{ebm}}) \\ &= c(t) + \int U_t(\mathbf{y}) p_{t, \text{data}}(\mathbf{y}) d\mathbf{y} - \int U(\mathbf{x}) p_{\text{data}}(\mathbf{x}) d\mathbf{x} - \int \log p_{\text{ebm}}(\mathbf{x}) p_{\text{data}}(\mathbf{x}) d\mathbf{x} \\ &= c(t) - \text{ED}_{\gamma_t}(p_{\text{data}}, U) - \mathbb{E}_{p_{\text{data}}(\mathbf{x})} [\log p_{\text{ebm}}(\mathbf{x})] \leq \frac{1}{2t} \mathbb{W}_2^2(p_{\text{data}}, p_{\text{ebm}}) \end{aligned}$$

662 □

#### 663 A.4 Representing ED as multi-scale SM for general Diffusion Processes

664 We now prove the connection between energy discrepancy and multi-noise scale score matching in a  
 665 general context. For all following results we will assume that  $\mathbf{x}_t$  is some stochastic diffusion process  
 666 which satisfies the SDE  $d\mathbf{x}_t = a(\mathbf{x}_t)dt + b(\mathbf{x}_t)d\mathbf{w}_t$  and assume that  $\mathbf{x}_0 \sim p_{\text{data}}$ . Let  $q_t$  denote the  
 667 associated transition probability density. To make the exposition cleaner we write  $U_t := U_{q_t}$ .

668 The main idea will be the following observation:

669 **Proposition 4.** *The diffusion-based energy discrepancy is given by the expectation of the Ito integral*

$$\text{ED}_{q_t}(p_{\text{data}}, U) = -\mathbb{E} \left[ \int_0^t dU_s(\mathbf{x}_s) \right]$$

670 *Proof.* The stochastic integral with respect to the differential  $dU_s(\mathbf{x}_s)$  is defined to satisfy the  
 671 following generalisation of the fundamental theorem of calculus:

$$U_t(\mathbf{x}_t) = U_0(\mathbf{x}_0) + \int_0^t dU_s(\mathbf{x}_s)$$

672 We obtain the desired result by taking expectations on both sides. □

673 Notice that the law of the random variable  $\mathbf{x}_s$  is fixed by the initial distribution of the diffusion  
 674  $\mathbf{x}_0 \sim p_{\text{data}}$ . These distributions are implied when taking the expectation. We will now explore this  
 675 connection further. For this we make some basic assumptions which allow us to connect stochastic  
 676 differential equations with partial differential equations.

677 **Assumption 2.** *Consider the stochastic differential equation  $d\mathbf{x}_t = a(\mathbf{x}_t)dt + b(\mathbf{x}_t)d\mathbf{w}_t$  for drift*  
 678  *$a : \mathbb{R}^d \rightarrow \mathbb{R}^d$  and  $b : \mathbb{R}^d \rightarrow \mathbb{R}^k$ . Further, define the diffusion matrix  $\Sigma(\mathbf{x}) = b(\mathbf{x})b(\mathbf{x})^T \in \mathbb{R}^{d \times d}$ . We*  
 679 *make the following assumptions:*

- 680 1. *There exists a  $\mu > 0$  such that for all  $\xi, \mathbf{x} \in \mathbb{R}^d$   $\langle \xi, \Sigma(\mathbf{x})\xi \rangle \geq \mu \|\xi\|^2$*
- 681 2.  *$\Sigma$  and  $a$  are bounded and uniformly Lipschitz-continuous in  $\mathbf{x}$  on every compact subset of*  
 682  *$\mathbb{R}^d$*
- 683 3.  *$\Sigma$  is uniformly Hölder-continuous in  $\mathbf{x}$*

684 **Theorem 4** (Fokker-Planck equation). *Under Assumption 2,  $\mathbf{x}_t$  has a transition density function*  
 685 *given by*

$$\mathbb{P}(\mathbf{x}_t \in A | \mathbf{x}_0 = \mathbf{x}) = \int_A q_t(\mathbf{y} | \mathbf{x}) d\mathbf{y}.$$

686 Furthermore,  $q_t$  satisfies the Fokker-Planck partial differential equation

$$\begin{aligned} \partial_t q_t(\mathbf{y} | \mathbf{x}) &= \sum_{i=1}^d \partial_{y_i} \left( -a_i(\mathbf{y}) q_t(\mathbf{y} | \mathbf{x}) + \frac{1}{2} \sum_{j=1}^d \partial_{y_j} (\Sigma_{ij}(\mathbf{y}) q_t(\mathbf{y} | \mathbf{x})) \right) \\ q_0(\mathbf{y} | \mathbf{x}) &= \delta(\mathbf{y} - \mathbf{x}) \end{aligned} \quad (10)$$

687 For a reference, see (Friedman, 2012, Theorem 5.4)

688 The Fokker-Planck equation yields the following important differential equation for the contrastive  
 689 potential  $U_t$ :

690 **Proposition 5.** *Consider the stochastic differential equation  $d\mathbf{x}_t = a(\mathbf{x}_t)dt + b(\mathbf{x}_t)d\mathbf{w}_t$  for drift*  
 691  *$a : \mathbb{R}^d \rightarrow \mathbb{R}^d$  and  $b : \mathbb{R}^d \rightarrow \mathbb{R}^k$ , and diffusion matrix  $\Sigma(\mathbf{x}) = b(\mathbf{x})b(\mathbf{x})^T \in \mathbb{R}^{d \times d}$  that satisfies*  
 692 *assumptions 2. Let  $q_t$  be the associated transition density and define the contrastive potential*  
 693  *$U_t(\mathbf{y}) := -\log \int q_t(\mathbf{y} | \mathbf{x}) \exp(-U(\mathbf{x})) d\mathbf{x}$ . Furthermore, we define the scalar field*

$$c(a, \Sigma)(\mathbf{y}) := \sum_{i=1}^d \left( \partial_{y_i} a_i(\mathbf{y}) - \frac{1}{2} \sum_{j=1}^d \partial_{y_i} \partial_{y_j} \Sigma_{ij} \right)$$

694 and the linear operator

$$\mathcal{L}(a, \Sigma) := \sum_{i=1}^d -a_i \frac{\partial}{\partial \mathbf{y}_i} + \frac{1}{2} \sum_{i,j=1}^d \left( 2\partial_{\mathbf{y}_j} \Sigma_{ij} \frac{\partial}{\partial \mathbf{y}_i} + \Sigma_{ij} \frac{\partial^2}{\partial \mathbf{y}_i \partial \mathbf{y}_j} \right).$$

695 Then, the contrastive potential satisfies the non-linear partial differential equation

$$\partial_t U_t(\mathbf{y}) = \mathcal{L}(a, \Sigma) U_t(\mathbf{y}) + \frac{1}{2} \|b^T(\mathbf{y}) \nabla U_t(\mathbf{y})\|^2 + c(a, \Sigma)(\mathbf{y})$$

696 *Proof.* We commute the linear operator of the Fokker-Planck equation to see that  $e^{-U_t}$  satisfies the  
697 Fokker-Planck equation in Theorem 4, too, i.e.

$$\begin{aligned} \partial_t e^{-U_t(\mathbf{y})} &= \sum_{i=1}^d \partial_{\mathbf{y}_i} \left( -a_i(\mathbf{y}) e^{-U_t(\mathbf{y})} + \frac{1}{2} \sum_{j=1}^d \partial_{\mathbf{y}_j} \left( \Sigma_{ij}(\mathbf{y}) e^{-U_t(\mathbf{y})} \right) \right) \\ e^{-U_0(\mathbf{y})} &= e^{-U(\mathbf{x})}. \end{aligned}$$

698 We now expand the term corresponding to the drift term:

$$\sum_{i=1}^d \partial_{\mathbf{y}_i} \left( -a_i(\mathbf{y}) e^{-U_t(\mathbf{y})} \right) = \sum_{i=1}^d \left( -\partial_{\mathbf{y}_i} a_i(\mathbf{y}) + a_i(\mathbf{y}) \partial_{\mathbf{y}_i} U_t(\mathbf{y}) \right) e^{-U_t(\mathbf{y})}$$

699 Similarly, we treat the diffusion term:

$$\begin{aligned} \frac{1}{2} \sum_{i,j=1}^d \partial_{\mathbf{y}_i} \partial_{\mathbf{y}_j} \left( \Sigma_{ij}(\mathbf{y}) e^{-U_t(\mathbf{y})} \right) &= \frac{1}{2} \sum_{i,j=1}^d \left( \partial_{\mathbf{y}_i} \partial_{\mathbf{y}_j} \Sigma_{ij}(\mathbf{y}) + \Sigma_{ij}(\mathbf{y}) \partial_{\mathbf{y}_j} U_t(\mathbf{y}) \partial_{\mathbf{y}_i} U_t(\mathbf{y}) \right. \\ &\quad \left. - 2\partial_{\mathbf{y}_j} \Sigma_{ij}(\mathbf{y}) \partial_{\mathbf{y}_i} U_t(\mathbf{y}) - \Sigma_{ij}(\mathbf{y}) \partial_{\mathbf{y}_j} \partial_{\mathbf{y}_i} U_t(\mathbf{y}) \right) e^{-U_t(\mathbf{y})} \end{aligned}$$

700 Finally, the time derivative simply becomes  $\partial_t e^{-U_t(\mathbf{y})} = -\partial_t U_t(\mathbf{y}) e^{-U_t(\mathbf{y})}$ . We can now collect all  
701 terms independent of  $U$  and identify

$$c(a, \Sigma)(\mathbf{y}) = \sum_{i=1}^d \left( \partial_{\mathbf{y}_i} a_i(\mathbf{y}) - \frac{1}{2} \sum_{j=1}^d \partial_{\mathbf{y}_i} \partial_{\mathbf{y}_j} \Sigma_{ij}(\mathbf{y}) \right)$$

702 as well as the linear operator term

$$\mathcal{L}(a, \Sigma) := \sum_{i=1}^d -a_i \frac{\partial}{\partial \mathbf{y}_i} + \frac{1}{2} \sum_{i,j=1}^d \left( 2\partial_{\mathbf{y}_j} \Sigma_{ij} \frac{\partial}{\partial \mathbf{y}_i} + \Sigma_{ij} \frac{\partial^2}{\partial \mathbf{y}_i \partial \mathbf{y}_j} \right)$$

703 Finally, we have

$$\begin{aligned} \sum_{i,j=1}^d \Sigma_{ij}(\mathbf{y}) \partial_{\mathbf{y}_j} U_t(\mathbf{y}) \partial_{\mathbf{y}_i} U_t(\mathbf{y}) &= \sum_{i,j=1}^d \sum_{l=1}^k b_{il}(\mathbf{y}) b_{jl}(\mathbf{y}) \partial_{\mathbf{y}_j} U_t(\mathbf{y}) \partial_{\mathbf{y}_i} U_t(\mathbf{y}) \\ &= \sum_{l=1}^k \sum_{i=1}^d (b_{l,i}^T(\mathbf{y}) \partial_{\mathbf{y}_i} U_t(\mathbf{y}))^2 = \|b^T(\mathbf{y}) \nabla U_t(\mathbf{y})\|^2 \end{aligned}$$

704 This gives us the partial differential equation

$$-\partial_t U_t(\mathbf{y}) e^{-U_t(\mathbf{y})} = \left( -\mathcal{L}(a, \Sigma) U_t(\mathbf{y}) + \frac{1}{2} \|b^T(\mathbf{y}) \nabla U_t(\mathbf{y})\|^2 - c(a, \Sigma)(\mathbf{y}) \right) e^{-U_t(\mathbf{y})}$$

705 Cancelling all exponentials from both sides of the equation yields the desired result.  $\square$

706 **Theorem 5.** The energy discrepancy takes the form of a generalised multi-noise scale score matching  
707 loss:

$$\text{ED}_{q_t}(p_{\text{data}}, U) = \mathbb{E} \left[ \int_0^t - \sum_{i,j=1}^d \partial_{\mathbf{x}_j} (\Sigma_{ij}(\mathbf{x}_s) \partial_{\mathbf{x}_i} U(\mathbf{x}_s)) + \frac{1}{2} \|b^T(\mathbf{x}_s) \nabla U_s(\mathbf{x}_s)\|^2 ds \right] + \text{const.}$$

708 *Proof.* For this proof we return to the stochastic process  $U_s(\mathbf{x}_s)$  from Proposition 4. By Ito's formula,  
 709  $U_s(\mathbf{x}_s)$  satisfies the stochastic differential equation

$$\begin{aligned} dU_s(\mathbf{x}_s) = & \left( \partial_s U_s(\mathbf{x}_s) + \sum_{i=1}^d a_i(\mathbf{x}_s) \partial_{\mathbf{x}_i} U_s(\mathbf{x}_s) + \frac{1}{2} \sum_{i,j=1}^d \Sigma_{ij}(\mathbf{y}) \partial_{\mathbf{x}_i} \partial_{\mathbf{x}_j} U_s(\mathbf{x}_s) \right) ds \\ & + \sum_{i=1}^d \sum_{l=1}^k \partial_{\mathbf{x}_i} U_s(\mathbf{x}_s) b_{i,l}(\mathbf{x}_s) d\mathbf{w}_s^l \end{aligned}$$

710 Under the additional integrability condition that  $\mathbb{E} \int_0^t \|b^T(\mathbf{x}_s) \nabla U_s(\mathbf{x}_s)\|^2 ds < \infty$ , the stochastic  
 711 integral with respect to Brownian motion  $d\mathbf{w}_s$  has expectation zero. Furthermore, we can replace  
 712  $\partial_s U_s(\mathbf{x}_s)$  with our previously obtained non-linear partial differential equation

$$\partial_s U_s(\mathbf{x}_s) = \mathcal{L}(a, \Sigma) U_s(\mathbf{x}_s) + \frac{1}{2} \|b^T(\mathbf{x}_s) \nabla U_s(\mathbf{x}_s)\|^2 + c(a, \Sigma)(\mathbf{x}_s).$$

713 Due to opposing signs, the drift  $a$  cancels, i.e.

$$\begin{aligned} \mathcal{L}(a, \Sigma) U_s(\mathbf{x}_s) + \sum_{i=1}^d a_i(\mathbf{x}_s) \partial_{\mathbf{x}_i} U_s(\mathbf{x}_s) + \frac{1}{2} \sum_{i,j=1}^d \Sigma_{ij}(\mathbf{y}) \partial_{\mathbf{x}_i} \partial_{\mathbf{x}_j} U_s(\mathbf{x}_s) \\ = \sum_{i,j=1}^d \left( \partial_{\mathbf{y}_j} \Sigma_{ij}(\mathbf{y}) \frac{\partial}{\partial \mathbf{y}_i} + \Sigma_{ij}(\mathbf{y}) \frac{\partial^2}{\partial \mathbf{x}_i \partial \mathbf{x}_j} \right) U_s(\mathbf{x}_s) \\ = \sum_{i,j=1}^d \partial_{\mathbf{x}_j} (\Sigma_{ij} \partial_{\mathbf{x}_i} U_s(\mathbf{x}_s)) \end{aligned}$$

714 Consequently, we obtain the final energy discrepancy expression using Proposition 4

$$\begin{aligned} \text{ED}_{q_t}(p_{\text{data}}, U) &= -\mathbb{E} \left[ \int_0^t dU_s(\mathbf{x}_s) \right] \\ &= -\mathbb{E} \left[ \int_0^t \sum_{i,j=1}^d \partial_{\mathbf{x}_j} (\Sigma_{ij}(\mathbf{x}_s) \partial_{\mathbf{x}_i} U_s(\mathbf{x}_s)) - \frac{1}{2} \|b^T(\mathbf{x}_s) \nabla U_s(\mathbf{x}_s)\|^2 ds \right] + \text{const.} \end{aligned}$$

715 with  $U$ -independent constant  $\int_0^t c(a, \Sigma)(\mathbf{x}_s) ds$ . This completes the proof.  $\square$

716 As a corollary we obtain the proof of the first statement in Theorem 2: Assume that  $q_t$  is de-  
 717 fined through the stochastic differential equation  $d\mathbf{x}_t = a(\mathbf{x}_t)dt + d\mathbf{w}_t$ . In this case,  $\Sigma = \mathbf{I}$  and  
 718  $\sum_{i,j=1}^d \partial_{\mathbf{x}_j} (\Sigma_{ij}(\mathbf{x}_s) \partial_{\mathbf{x}_i} U_s(\mathbf{x}_s)) = \Delta U_s(\mathbf{x}_s)$ . Consequently, we obtain from Theorem 5 the score  
 719 matching representation of  $\text{ED}_{q_t}$  in Theorem 2. In the special case that  $\Sigma = bb^T$  is independent of  $\mathbf{x}$   
 720 we obtain an integrated sliced score-matching loss.

## 721 A.5 Connections of Energy Discrepancy with Contrastive Divergence

722 The contrastive divergence update can be derived from an energy discrepancy when, for  $E_\theta$  fixed,  $q$   
 723 satisfies the detailed balance relation

$$q(\mathbf{y}|\mathbf{x}) \exp(-E_\theta(\mathbf{x})) = q(\mathbf{x}|\mathbf{y}) \exp(-E_\theta(\mathbf{y})).$$

724 To see this, we calculate the contrastive potential induced by  $q$ : We have

$$-\log \int q(\mathbf{y}|\mathbf{x}) \exp(-E_\theta(\mathbf{x})) d\mathbf{x} = -\log \int q(\mathbf{x}|\mathbf{y}) \exp(-E_\theta(\mathbf{y})) d\mathbf{x} = E_\theta(\mathbf{y}).$$

725 Consequently, the energy discrepancy induced by  $q$  is given by

$$\text{ED}_q(p_{\text{data}}, E_\theta) = \mathbb{E}_{p_{\text{data}}(\mathbf{x})}[E_\theta(\mathbf{x})] - \mathbb{E}_{p_{\text{data}}(\mathbf{x})} \mathbb{E}_{q(\mathbf{y}|\mathbf{x})}[E_\theta(\mathbf{y})].$$

726 Updating  $\theta$  based on a sample approximation of this loss leads to the contrastive divergence update

$$\Delta \theta \propto \frac{1}{N} \sum_{i=1}^N \nabla_\theta E_\theta(\mathbf{x}^i) - \frac{1}{N} \sum_{i=1}^N \nabla_\theta E_\theta(\mathbf{y}^i) \quad \mathbf{y}^i \sim q(\cdot|\mathbf{x}^i)$$

727 Three things are important to notice:

1. Implicitly, the distribution  $q$  depends on  $E_\theta$  and needs to be adjusted in each step of the algorithm
2. For fixed  $q$ ,  $\text{ED}_q(p_{\text{data}}, E_\theta)$  satisfies Theorem 1. This means that each step of contrastive divergence optimises a loss with minimiser  $E_\theta^* = -\log p_{\text{data}} + c$ . However,  $q$  needs to be adjusted in each step as otherwise the contrastive potential is not given by the energy function  $E_\theta$  itself.
3. This result highlights the importance to use Metropolis-Hastings adjusted Langevin-samplers to implement CD to ensure that the implied  $q$  distribution satisfies the detailed balance relation. This matches the observations found by [Yair & Michaeli \(2021\)](#).

## A.6 Derivation of Energy Discrepancy from KL Contractions

A Kullback-Leibler contraction is the divergence function  $\text{KL}(p_{\text{data}} \parallel p_{\text{ebm}}) - \text{KL}(Qp_{\text{data}} \parallel Qp_{\text{ebm}})$  ([Lyu, 2011](#)) for the convolution operator  $Qp(\mathbf{y}) = \int q(\mathbf{y}|\mathbf{x})p(\mathbf{x})d\mathbf{x}$ . The linearity of the convolution operator retains the normalisation of the measure, i.e. for the energy-based distribution  $p_{\text{ebm}}$  we have

$$Qp_{\text{ebm}} = \frac{1}{Z_U} \int q(\mathbf{y}|\mathbf{x}) \exp(-U(\mathbf{x})) d\mathbf{x} \quad \text{with} \quad Z_U = \int \exp(-U(\mathbf{x})) d\mathbf{x}.$$

The KL divergences then become with  $U_q := -\log Q \exp(-U(\mathbf{x}))$

$$\begin{aligned} \text{KL}(p_{\text{data}} \parallel p_{\text{ebm}}) &= \mathbb{E}_{p_{\text{data}}(\mathbf{x})}[\log p_{\text{data}}(\mathbf{x})] + \mathbb{E}_{p_{\text{data}}(\mathbf{x})}[U(\mathbf{x})] + \log Z_U \\ \text{KL}(Qp_{\text{data}} \parallel Qp_{\text{ebm}}) &= \mathbb{E}_{Qp_{\text{data}}(\mathbf{y})}[\log Qp_{\text{data}}(\mathbf{y})] + \mathbb{E}_{Qp_{\text{data}}(\mathbf{y})}[U_q(\mathbf{y})] + \log Z_U \end{aligned}$$

Since the normalisation cancels when subtracting the two terms we find

$$\text{KL}(p_{\text{data}} \parallel p_{\text{ebm}}) - \text{KL}(Qp_{\text{data}} \parallel Qp_{\text{ebm}}) = \text{ED}_q(p_{\text{data}}, U) + c$$

where  $c$  is a constant that contains the  $U$ -independent entropies of  $p_{\text{data}}$  and  $Qp_{\text{data}}$ .

## B Aspects of Training EBMs with Energy Discrepancy

### B.1 Conceptual Understanding of the $w$ -Stabilisation

The critical step for using energy discrepancy in practice is a stable approximation of the contrastive potential. For the Gaussian-based energy discrepancy, we can write the contrastive potential as  $U_t(\mathbf{y}) = -\log \mathbb{E}[\exp(-U(\mathbf{y} + \sqrt{t}\boldsymbol{\xi}'))]$  with  $\boldsymbol{\xi}' \sim \mathcal{N}(0, \mathbf{I})$  and  $\mathbf{y} \in \mathbb{R}^d$ . A naive approximation of the expectation with a Monte-Carlo estimator, however, is biased because of Jensen's inequality, i.e. for  $\boldsymbol{\xi}', \boldsymbol{\xi}'^j \sim \mathcal{N}(0, \mathbf{I})$  we have

$$U_t(\mathbf{y}) = -\log \mathbb{E}[\exp(-U(\mathbf{y} + \sqrt{t}\boldsymbol{\xi}'))] < -\mathbb{E} \left[ \log \frac{1}{M} \sum_{j=1}^M \exp(-U(\mathbf{y} + \sqrt{t}\boldsymbol{\xi}'^j)) \right].$$

Our first observation is that the appearing bias can be quantified to leading order. For this, define  $v_t(\mathbf{y}) := \mathbb{E}[\exp(-U(\mathbf{y} + \sqrt{t}\boldsymbol{\xi}'))]$  and  $\hat{v}_t(\mathbf{y}) := \frac{1}{M} \sum_{j=1}^M \exp(-U(\mathbf{y} + \sqrt{t}\boldsymbol{\xi}'^j))$ . We use the Taylor-expansion of  $\log(1+u) \approx u - 1/2u^2 + \text{h.o.t.}$  which gives

$$\begin{aligned} \mathbb{E} \log \hat{v}_t(\mathbf{y}) - \log v_t(\mathbf{y}) &= \mathbb{E} \left[ \log \left( 1 + \frac{\hat{v}_t(\mathbf{y}) - v_t(\mathbf{y})}{v_t(\mathbf{y})} \right) \right] \\ &\approx -\frac{1}{2} \mathbb{E} \left[ \frac{(\hat{v}_t(\mathbf{y}) - v_t(\mathbf{y}))^2}{v_t(\mathbf{y})^2} \right] + \text{h.o.t.} \\ &= -\frac{1}{2Mv_t(\mathbf{y})^2} \text{Var} \left[ \exp(-U(\mathbf{y} + \sqrt{t}\boldsymbol{\xi}')) \right] + \text{h.o.t.} \end{aligned} \tag{11}$$

The linear term in the Taylor-expansion does not contribute because  $\mathbb{E}[\hat{v}_t(\mathbf{y})] = v_t(\mathbf{y})$ . In the final equation we used that  $\text{Var}(\hat{v}_t(\mathbf{y})) = \text{Var}[\exp(-U(\mathbf{y} + \sqrt{t}\boldsymbol{\xi}'))]/M$  because all  $\boldsymbol{\xi}'^j$  are independent. The Taylor expansion shows that the dominating contribution to the bias is the variance of the approximated convolution integral.

Our second observation is that this occurring bias can become infinite for malformed energy functions. For this reason, the optimiser may start to increase the bias instead of minimising our target loss. To illustrate how a high-variance estimator of the contrastive potential can be divergent, consider the energy function

$$U(\mathbf{x}) = \begin{cases} 0 & \text{for } \mathbf{x} \leq 0 \\ b\mathbf{x} & \text{for } \mathbf{x} > 0 \end{cases}.$$

The energy function does not strictly adhere to our conditions that the energy based model should be normalisable. Our argument still holds when  $\exp(-U)$  is changed to be normalisable. In theory, the contrastive potential at 0 is upper bounded because

$$U_t(0) \leq -\lim_{b \rightarrow \infty} \log \mathbb{E} [\exp(-U(\sqrt{t}\xi'))] = -\log \mathbb{P}(\xi' \leq 0) = -\log(1/2)$$

because  $\exp(-U(\mathbf{x}))$  converges to an indicator function on  $\{\mathbf{x} \leq 0\}$  as  $b \rightarrow \infty$ . The Monte Carlo estimator of the contrastive potential, on the other hand, has upper bound

$$\hat{U}_t(0) = -\log \frac{1}{M} \sum_{j=1}^M \exp(-U(\sqrt{t}\xi'^j)) \leq \min[U(\sqrt{t}\xi'^1), \dots, U(\sqrt{t}\xi'^M)] + \log(M)$$

which can be seen by applying standard inequalities for the logsumexp function<sup>3</sup>. Hence, as long as there exists a  $j$  such that  $\xi'^j \leq 0$ , the estimated contrastive potential does not diverge. If, however,  $\xi'^j > 0$  for every  $j = 1, \dots, M$ , then

$$\hat{U}_t(0) \geq \min[U(\sqrt{t}\xi'^1), \dots, U(\sqrt{t}\xi'^M)] = b\sqrt{t} \min[\xi'^1, \dots, \xi'^M] \xrightarrow{b \rightarrow \infty} \infty.$$

Consequently, the approximate contrastive potential may attain diverging values at discontinuities in the energy function. Indeed, this phenomenon is observed for  $w = 0$  in Figure 2. Here, the learned energy becomes discontinuous at the edge of the support and the energy discrepancy loss diverges during training. In low dimensions, this problem can be alleviated by using variance reduction techniques such as antithetic variables or by using large enough values of  $M$  during the training. The stabilising effect of  $M$  is observed in our ablation studies in Figure 21. In high-dimensional settings, however, such variance reduction techniques are infeasible.

The idea of the  $w$ -stabilisation is that the value of the energy at non-perturbed data points  $U(\mathbf{x}_0)$  is guaranteed to stay controlled since it is minimised in the optimisation of ED. Hence, the diverging contrasting potential can be controlled by including  $U(\mathbf{x}_0)$  in the summation in the logsumexp operation which acts as a soft-min over all contrasting energy contributions. Indeed, this augmentation provides a deterministic upper bound to the approximated contrastive potential:

$$\begin{aligned} \hat{U}_{t,w}(\mathbf{x}_t) &= -\log \left( \frac{w}{M} \exp(-U(\mathbf{x}_0)) + \frac{1}{M} \sum_{j=1}^M \exp(-U(\mathbf{x}_t + \sqrt{t}\xi'^j)) \right) \\ &\leq \min[U(\mathbf{x}_t + \sqrt{t}\xi'^1), \dots, U(\mathbf{x}_t + \sqrt{t}\xi'^M), U(\mathbf{x}_0) - \log(w)] + \log(M) \end{aligned}$$

Additionally, the  $w$ -stabilisation introduces a negative bias to the approximated contrastive potential. Hence, if tuned correctly, it counteracts the bias introduced by the Jensen-gap of the logarithm.

To gain additional intuition on the effect of  $w$ , notice that by the same bounds as before,

$$U(\mathbf{x}_0) - \hat{U}_{t,w}(\mathbf{x}_t) \leq \min [U(\mathbf{x}_0) - U(\mathbf{x}_t + \sqrt{t}\xi'^1), \dots, U(\mathbf{x}_0) - U(\mathbf{x}_t + \sqrt{t}\xi'^M), \log(w)]$$

for every data point  $\mathbf{x}$ . This tells us that, roughly speaking, a perturbed data point with  $U(\mathbf{x}_0) - U(\mathbf{x}_t + \sqrt{t}\xi') > \log(w)$  should have a small contribution to the loss and the optimisation converges if the data distribution is learned or when the bound is violated at all perturbed data points. Thus,  $\log(w)$  describes a weak notion of a margin between positive and negative energy contributions. Consequently, large values for  $w \in (0, 1)$  tend to lead to flatter learned energies, while smaller values lead to steeper learned energies. This intuition is confirmed by Figures 2 and 21.

<sup>3</sup>It holds that  $\min(u_1, u_2, \dots, u_M) - \log(M) \leq -\text{LSE}(-u_1, -u_2, \dots, -u_M) \leq \min(u_1, u_2, \dots, u_M)$

791 **Asymptotic consistency of sample approximation of ED** We give a proof for Theorem 3 which  
 792 states that our approximation of energy discrepancy is justified. To make the exposition easier to  
 793 understand, we first show how the energy discrepancy is transformed into a conditional expectation.  
 794 Recall the probabilistic representation of the contrastive potential Section 4. Using  $E_\theta(\mathbf{x}) =$   
 795  $\log(\exp(E_\theta(\mathbf{x})))$  we obtain the following rewritten form of energy discrepancy:

$$\begin{aligned} \text{ED}_{\gamma_t}(p_{\text{data}}, E_\theta) &= \mathbb{E}_{p_{\text{data}}(\mathbf{x})}[E_\theta(\mathbf{x})] + \mathbb{E}_{p_{\text{data}}(\mathbf{x})}\mathbb{E}_{\gamma_t(\mathbf{y}-\mathbf{x})} \left[ \log \mathbb{E}_{\gamma_1(\xi')} \left[ \exp(-E_\theta(\mathbf{y} + \sqrt{t}\xi')|\mathbf{y}) \right] \right] \\ &= \mathbb{E}_{p_{\text{data}}(\mathbf{x})}[E_\theta(\mathbf{x})] + \mathbb{E}_{p_{\text{data}}(\mathbf{x})}\mathbb{E}_{\gamma_1(\xi)} \left[ \log \mathbb{E}_{\gamma_1(\xi')} \left[ \exp(-E_\theta(\mathbf{x} + \sqrt{t}\xi + \sqrt{t}\xi')|\mathbf{x}, \xi) \right] \right] \\ &= \mathbb{E}_{p_{\text{data}}(\mathbf{x})}\mathbb{E}_{\gamma_1(\xi)} \left[ \log(\exp(E_\theta(\mathbf{x}))) + \log \mathbb{E}_{\gamma_1(\xi')} \left[ \exp(-E_\theta(\mathbf{x} + \sqrt{t}\xi + \sqrt{t}\xi')|\mathbf{x}, \xi) \right] \right] \\ &= \mathbb{E}_{p_{\text{data}}(\mathbf{x})}\mathbb{E}_{\gamma_1(\xi)} \left[ \log \left( \mathbb{E}_{\gamma_1(\xi')} \left[ \exp(E_\theta(\mathbf{x}) - E_\theta(\mathbf{x} + \sqrt{t}\xi + \sqrt{t}\xi')|\mathbf{x}, \xi) \right] \right) \right] \end{aligned}$$

796 The conditioning means that the expectation is not taken with respect to  $\mathbf{y}$  or  $\mathbf{x}$  and  $\xi$  in the inner  
 797 expectation. The conditioning is important to understand how the law of large numbers is to be  
 798 applied. We now come to the proof that our approximation is consistent with the definition of energy  
 799 discrepancy:

800 **Theorem 3.** Assume that  $\mathbf{x} \mapsto \exp(-E_\theta(\mathbf{x}))$  is uniformly bounded. Then, for every  $\varepsilon > 0$  there  
 801 exist  $N$  and  $M(N)$  such that  $|\mathcal{L}_{t,M(N),w}(\theta) - \text{ED}_{\gamma_t}(p_{\text{data}}, E_\theta)| < \varepsilon$  almost surely.

802 *Proof.* First, consider independent random variables  $\mathbf{x} \sim p_{\text{data}}$ ,  $\xi \sim \mathcal{N}(0, \mathbf{I})$ , and  $\xi'^j \stackrel{i.i.d.}{\sim} \mathcal{N}(0, \mathbf{I})$ .  
 803 Using the triangle inequality, we can upper bound the difference  $|\text{ED}_{\gamma_t}(p_{\text{data}}, E_\theta) - \mathcal{L}_{t,M,w}(\theta)|$  by  
 804 upper bounding the following two terms, individually:

$$\begin{aligned} &\left| \text{ED}_{\gamma_t}(p_{\text{data}}, E_\theta) - \frac{1}{N} \sum_{i=1}^N \log \mathbb{E} \left[ \exp(E_\theta(\mathbf{x}^i) - E_\theta(\mathbf{x}^i + \sqrt{t}\xi^i + \sqrt{t}\xi'^j) \mid \mathbf{x}^i, \xi^i) \right] \right| \\ &\quad + \left| \frac{1}{N} \sum_{i=1}^N \log \mathbb{E} \left[ \exp(E_\theta(\mathbf{x}^i) - E_\theta(\mathbf{x}^i + \sqrt{t}\xi^i + \sqrt{t}\xi'^j) \mid \mathbf{x}^i, \xi^i) \right] - \mathcal{L}_{t,M,w}(\theta) \right| \end{aligned}$$

805 The first term can be bounded by a sequence  $\varepsilon_N \xrightarrow{a.s.} 0$  due to the normal strong law of large numbers.  
 806 The second term can be estimated by applying the following conditional version of the strong law of  
 807 large numbers (Majerek et al., 2005, Theorem 4.2):

$$\frac{1}{M} \sum_{j=1}^M \exp \left( E_\theta(\mathbf{x}) - E_\theta(\mathbf{x} + \sqrt{t}\xi + \sqrt{t}\xi'^j) \right) \xrightarrow{a.s.} \mathbb{E} \left[ \exp(E_\theta(\mathbf{x}) - E_\theta(\mathbf{x} + \sqrt{t}\xi + \sqrt{t}\xi')) \mid \mathbf{x}, \xi \right]$$

808 Next, we have that the deterministic sequence  $w/M \rightarrow 0$ . Thus, adding the regularisation  $w/M$   
 809 does not change the limit in  $M$ . Furthermore, since the logarithm is continuous, the limit also holds  
 810 after applying the logarithm. Finally, the estimate translates to the sum by another application of the  
 811 triangle inequality. We define

$$\Delta e_\theta(\mathbf{x}, \xi, \xi') := \exp(E_\theta(\mathbf{x}) - E_\theta(\mathbf{x} + \sqrt{t}\xi + \sqrt{t}\xi'))$$

812 For each  $i = 1, 2, \dots, N$  there exists a sequence  $\varepsilon_{i,M} \xrightarrow{a.s.} 0$  such that

$$\begin{aligned} &\left| \frac{1}{N} \sum_{i=1}^N \log \mathbb{E} \left[ \Delta e_\theta(\mathbf{x}^i, \xi^i, \xi') \mid \mathbf{x}^i, \xi^i \right] - \mathcal{L}_{t,M,w}(\theta) \right| \\ &\leq \frac{1}{N} \sum_{i=1}^N \left| \log \mathbb{E} \left[ \Delta e_\theta(\mathbf{x}^i, \xi^i, \xi') \mid \mathbf{x}^i, \xi^i \right] - \log \frac{1}{M} \sum_{j=1}^M \Delta e_\theta(\mathbf{x}^i, \xi^i, \xi'^j) \right| \\ &< \frac{1}{N} \sum_{i=1}^N \varepsilon_{i,M} \leq \max(\varepsilon_{1,M}, \dots, \varepsilon_{N,M}). \end{aligned}$$

813 Hence, for each  $\varepsilon > 0$  there exists an  $N \in \mathbb{N}$  and an  $M(N) \in \mathbb{N}$  such that  $|\text{ED}_{\gamma_t}(p_{\text{data}}, E_\theta) -$   
 814  $\mathcal{L}_{t,M(N),w}(\theta)| < \varepsilon$  almost surely.  $\square$



## 815 B.2 Approximation of Energy Discrepancy based on general Ito Diffusions

816 Energy discrepancies are useful objectives for energy-based modelling when the contrastive potential  
 817 can be approximated easily and stably. In most cases this requires us to write the contrastive  
 818 potential as an expectation which can be computed using Monte Carlo methods. We show how such  
 819 a probabilistic representation can be achieved for a much larger class of stochastic processes via  
 820 application of the Feynman-Kac formula. We first highlight the difficulty. Consider the integral  
 821  $\int f(\mathbf{y})q_t(\mathbf{y}|\mathbf{x})p_{\text{data}}(\mathbf{x})d\mathbf{x}d\mathbf{y}$ . Since the expectation is taken in  $\mathbf{y}$ , the integral can be represented as  
 822 an expectation of the forward process associated with  $q_t$ , i.e.

$$\int f(\mathbf{y})q_t(\mathbf{y}|\mathbf{x})p_{\text{data}}(\mathbf{x})d\mathbf{x}d\mathbf{y} = \mathbb{E}_{p_{\text{data}}(\mathbf{x}_0)}[f(\mathbf{x}_t)] \approx \frac{1}{N} \sum_{i=1}^N f(\mathbf{x}_t^i)$$

823 where  $\mathbf{x}_t^i$  are simulated processes initialised at  $\mathbf{x}_0^i = \mathbf{x}^i \sim p_{\text{data}}$ . Next, consider the integral

$$v(t, \mathbf{y}) := \int q_t(\mathbf{y}|\mathbf{x})g(\mathbf{x})d\mathbf{x}.$$

824 This integral is more difficult to approximate because the function  $g$  is evaluated at the starting point  
 825 of the diffusion  $\mathbf{x}_t$  but weighted by it's transition probability density. To compute such integrals  
 826 without sampling from  $g$  we use the Feynman-Kac formula, see e.g. [Øksendal \(2003\)](#):

827 **Theorem 6** (Feynman-Kac). *Let  $g \in C_0^2(\mathbb{R}^d)$  and  $c \in C(\mathbb{R}^d)$ . Assume that  $v \in C^{1,2}(\mathbb{R}_{\geq 0}, \mathbb{R}^d)$  is*  
 828 *bounded on  $K \times \mathbb{R}^d$  with  $K$  compact and satisfies*

$$\begin{cases} \partial_t v(t, \mathbf{y}) = \mathcal{A}v(t, \mathbf{y}) + c(\mathbf{y})v(t, \mathbf{y}) & \text{for all } t > 0, \mathbf{y} \in \mathbb{R}^d \\ v(0, \mathbf{y}) = g(\mathbf{y}) & \text{for all } \mathbf{y} \in \mathbb{R}^d \end{cases}. \quad (12)$$

829 Then,  $v$  has the probabilistic representation

$$v(t, \mathbf{y}) = \mathbb{E}_{\mathbf{y}} \left[ \exp \left( \int_0^t c(\mathbf{y}_s)ds \right) g(\mathbf{y}_t) \right]$$

830 where  $(\mathbf{y}_t)_{t \geq 0}$  is a diffusion process with infinitesimal generator  $\mathcal{A}$ .

831 We will establish that  $v(t, \mathbf{y})$  satisfies a partial differential equation of the above form which yields a  
 832 probabilistic representation of the contrastive potential. We know that  $v(t, \mathbf{y})$  satisfies the Fokker-  
 833 Planck equation (10). By applying the product rule to each term in the Fokker-Planck equation we  
 834 find

$$\begin{aligned} \partial_t v(t, \mathbf{y}) &= \left( \overbrace{\sum_{i=1}^d \left( -a_i(\mathbf{y}) + \sum_{j=1}^d \partial_{\mathbf{y}_j} \Sigma_{ij}(\mathbf{y}) \right) \partial_{\mathbf{y}_i}}^{\alpha(\mathbf{y})} + \frac{1}{2} \sum_{i,j}^d \Sigma_{ij}(\mathbf{y}) \partial_{\mathbf{y}_i} \partial_{\mathbf{y}_j} \right) v(t, \mathbf{y}) \\ &\quad + \underbrace{\left( \frac{1}{2} \sum_{i,j=1}^d \partial_{\mathbf{y}_i} \partial_{\mathbf{y}_j} \Sigma_{ij}(\mathbf{y}) - \sum_{i=1}^d \partial_{\mathbf{y}_i} a_i(\mathbf{y}) \right)}_{c(\mathbf{y})} v(t, \mathbf{y}) \\ v(0, \mathbf{y}) &= g(\mathbf{y}). \end{aligned}$$

835 By comparing with Theorem 6, we identify the infinitesimal generator

$$\mathcal{A} = \sum_{i=1}^d \alpha_i(\mathbf{y}) \frac{\partial}{\partial \mathbf{y}_i} + \frac{1}{2} \sum_{i=1}^d \sum_{j=1}^d \Sigma_{ij}(\mathbf{y}) \frac{\partial^2}{\partial \mathbf{y}_i \partial \mathbf{y}_j}$$

836 Hence we associate the forward diffusion process  $d\mathbf{x}_t = a(\mathbf{x}_t)dt + b(\mathbf{x}_t)d\mathbf{w}_t$  with it's backwards  
 837 process with infinitesimal generator  $\mathcal{A}$

$$d\mathbf{y}_t = \alpha(\mathbf{y}_t)dt + b(\mathbf{y}_t)d\mathbf{w}'_t$$

with  $\Sigma(\mathbf{y}) = b(\mathbf{y})b^T(\mathbf{y})$ . This yields the probabilistic representation of  $v(t, \mathbf{y})$  in terms of the backward process  $\mathbf{y}_t$ :

$$v(t, \mathbf{y}) = \int q_t(\mathbf{y}|\mathbf{x})g(\mathbf{x})d\mathbf{x} = \mathbb{E}_{\mathbf{y}} \left[ \exp \left( \int_0^t c(\mathbf{y}_s)ds \right) g(\mathbf{y}_t) \right]$$

Hence, we also obtain a probabilistic representation for the contrastive potential by choosing  $g(\mathbf{x}) := \exp(-U(\mathbf{x}))$ . This finally gives

$$U_t(\mathbf{y}) = -\log \mathbb{E}_{\mathbf{y}} \left[ \exp \left( \int_0^t c(\mathbf{y}_s)ds - U(\mathbf{y}_t) \right) \right].$$

Unlike the contrasting term in contrastive divergence, this expression can indeed be calculated by simulating stochastic processes that are entirely independent of  $U$ . For this we simulate from the forward process starting at  $\mathbf{x}$  which yields  $\tilde{\mathbf{x}}_t$ , where the tilde denotes that this simulation may not be exact. We then simulate  $M$  copies of the reverse process and keep all values at intermediate steps, i.e.  $(\tilde{\mathbf{y}}_{t_0}^j = \tilde{\mathbf{x}}_t, \tilde{\mathbf{y}}_{t_1}^j, \dots, \tilde{\mathbf{y}}_{t_K=t}^j)$  for  $j = 1, \dots, M$ . Finally we evaluate the contrastive potential as

$$U_t(\mathbf{x}_t) \approx -\log \frac{1}{M} \sum_{j=1}^M \exp \left( \left( \sum_{k=1}^K c(\tilde{\mathbf{y}}_{t_k}^j)(t_k - t_{k-1}) \right) - U(\tilde{\mathbf{y}}_t^j) \right)$$

The simulation method for the stochastic process and for the integration  $\int_0^t c(\mathbf{y}_s)ds$  may be altered in this approximation. At this stage, it is unclear what practical implications the weighting term  $\int_0^t c(\mathbf{y}_s)ds$  has. Notice that the process  $\mathbf{y}_t$  is initialised at the final simulated position of the forward process  $\tilde{\mathbf{x}}_t$ . Furthermore, the bias correction with the  $w$ -stabilisation or an alternative method should still be relevant for stable training of energy-based models.

### B.3 Energy Discrepancy on the Discrete Space $\{0, 1\}^d$

Energy discrepancies are, in principle, well-defined on discrete spaces. To illustrate this point, we describe the energy-discrepancy loss for  $\{0, 1\}^d$  valued data such as images with binary pixel values, in which case the discrete energy-discrepancy is straight forward to implement. We will replace the Gaussian transition density with a Bernoulli distribution. For  $\varepsilon \in (0, 1)$ , let  $\boldsymbol{\xi} \sim \text{Bernoulli}(\varepsilon)^d$ . Then the transition  $\mathbf{y} = \mathbf{x} + \boldsymbol{\xi} \bmod(2)$  is symmetric and induces a symmetric transition density  $q(\mathbf{y} - \mathbf{x})$ . Because of the symmetry, the energy discrepancy can be implemented in the same way as in the continuous case, i.e.

$$\mathcal{L}(\theta) := \frac{1}{N} \sum_{i=1}^N \left( \frac{w}{M} + \log \frac{1}{M} \sum_{j=1}^M \exp (E_{\theta}(\mathbf{x}_i) - E_{\theta}(\mathbf{x}_i + \boldsymbol{\xi}^i + \boldsymbol{\xi}^{ij} \bmod(2))) \right)$$

Since the manifold hypothesis is true in a similar way for discrete image data, we conclude that additional tools need to be used in the optimisation and leave numerical experiments for the discrete case for future work.

## C Latent Space Energy-Based Prior Models

In this section, we first briefly review the latent space energy-based prior models (LEBMs) and its variants: CD-LEBM, SM-LEBM, and ED-LEBM. We then proceed to the experimental details.

### C.1 A Brief Review of LEBMs

Latent space energy-based prior models (Pang et al., 2020) seek to model latent variable models  $p_{\phi, \theta}(\mathbf{x}) = \int p_{\phi}(\mathbf{x}|\mathbf{z})p_{\theta}(\mathbf{z})d\mathbf{z}$  with an EBM prior  $p_{\theta}(\mathbf{z}) = \frac{\exp(-E_{\theta}(\mathbf{z}))p_0(\mathbf{z})}{Z_{\theta}}$ , where  $p_0(\mathbf{z})$  is a base distribution which we choose as standard Gaussian (Pang et al., 2020). LEBMs often perform better than latent variable models with a fixed Gaussian prior like VAEs since the EBM prior is more informative and expressive (Pang et al., 2020, Appendix C). However, training LEBMs is more expensive compared to latent variable models with fixed Gaussian prior because of the cost of training for energy-based models. This motivates to explore various training strategies for EBM such as

874 contrastive divergence, score matching, and the proposed energy discrepancy, where we find that  
875 energy discrepancy is the most efficient in terms of computational complexity.

876 The parameter update for the LEBM can be derived from maximum-likelihood estimation of  $p_{\phi,\theta}(\mathbf{x})$ .  
877 Using the identity  $\mathbb{E}_{p_{\phi,\theta}(\mathbf{z}|\mathbf{x})}[\nabla_{\phi,\theta} \log p_{\phi,\theta}(\mathbf{z}|\mathbf{x})] = 0$ , the gradient of the log-likelihood of a data point  
878  $\mathbf{x}$  is given by

$$\nabla_{\phi,\theta} \log p_{\phi,\theta}(\mathbf{x}) = \mathbb{E}_{p_{\phi,\theta}(\mathbf{z}|\mathbf{x})}[\nabla_{\phi,\theta} \log p_{\phi,\theta}(\mathbf{z}, \mathbf{x})] = \mathbb{E}_{p_{\phi,\theta}(\mathbf{z}|\mathbf{x})}[\nabla_{\phi} \log p_{\phi}(\mathbf{x}|\mathbf{z}) + \nabla_{\theta} \log p_{\theta}(\mathbf{z})].$$

879 The posterior  $p_{\phi,\theta}(\mathbf{z}|\mathbf{x})$  prescribes the latent representation of the data point  $\mathbf{x}$ . Consequently, in  
880 each parameter update, samples are generated from the posterior distribution  $p_{\phi,\theta}(\mathbf{z}|\mathbf{x})$  via running  
881 Langevin dynamics and are treated as data on latent space. The generator is then updated via

$$\nabla_{\phi} \log p_{\phi,\theta}(\mathbf{x}) = \mathbb{E}_{p_{\phi,\theta}(\mathbf{z}|\mathbf{x})}[\nabla_{\phi} \log p_{\phi}(\mathbf{x}|\mathbf{z})], .$$

882 Similarly, the maximum-likelihood update for the EBM parameters  $\theta$  is given by  $\nabla_{\theta} \log p_{\phi,\theta}(\mathbf{x}) =$   
883  $\mathbb{E}_{p_{\phi,\theta}(\mathbf{z}|\mathbf{x})}[\nabla_{\theta} \log p_{\theta}(\mathbf{z})]$ . As with any EBM, this gradient can not be used, directly, since this would  
884 require a tractable normalisation constant  $Z_{\theta}$ . To make this update tractable, we replace the gradient  
885 of the log-likelihood with contrastive divergence, score matching, and energy discrepancy as lined  
886 out below.

887 **CD-LEBM (Pang et al., 2020).** The contrastive divergence update is obtained as per usual by  
888 expressing the gradient of the log likelihood in terms of the energy function

$$\nabla_{\theta} \log p_{\phi,\theta}(\mathbf{x}) = \mathbb{E}_{p_{\phi,\theta}(\mathbf{z}|\mathbf{x})}[\nabla_{\theta} \log p_{\theta}(\mathbf{z})] = \mathbb{E}_{p_{\theta}(\mathbf{z})}[\nabla_{\theta} E_{\theta}(\mathbf{z})] - \mathbb{E}_{p_{\phi,\theta}(\mathbf{z}|\mathbf{x})}[\nabla_{\theta} E_{\theta}(\mathbf{z})].$$

889 Therefore, the EBM prior can be learned by minimizing

$$\mathcal{L}_{\text{CD}}(\theta) := \frac{1}{N} \sum_{i=1}^N E_{\theta}(\mathbf{z}_{+}^i) - E_{\theta}(\mathbf{z}_{-}^i), \quad \mathbf{z}_{+}^i \sim p_{\phi,\theta}(\mathbf{z}|\mathbf{x}^i), \mathbf{z}_{-}^i \sim p_{\theta}(\mathbf{z}). \quad (13)$$

890 Note that optimizing CD-LEBM is computationally expensive, as training the EBM prior requires  
891 simulating Langevin dynamics to sample  $\mathbf{z}$  from  $p_{\phi,\theta}(\mathbf{z}|\mathbf{x})$  to generate positive samples and  $p_{\theta}(\mathbf{z})$  to  
892 generate negative samples.

893 **SM-LEBM.** The second solution is to minimize the Fisher divergence between the posterior and  
894 prior, which has the following form

$$\frac{1}{2} \mathbb{E}_{p_{\phi,\theta}(\mathbf{z}|\mathbf{x})}[\|\nabla_{\mathbf{z}} \log p_{\theta}(\mathbf{z}) - \nabla_{\mathbf{z}} \log p_{\phi,\theta}(\mathbf{z}|\mathbf{x})\|_2^2].$$

895 This is equivalent to score matching (Hyvärinen & Dayan, 2005) when  $p_{\phi,\theta}(\mathbf{z}|\mathbf{x})$  is treated as  
896 *parameter independent* data distribution. We refer to this approach as score-matching LEBM, in  
897 which the EBM prior is learned by minimising

$$\mathcal{L}_{\text{SM}}(\theta) := \frac{1}{N} \sum_{i=1}^N \frac{1}{2} \|\nabla_{\mathbf{z}} \log p_{\theta}(\mathbf{z}^i) - \nabla_{\mathbf{z}} \log p(\mathbf{z}^i|\mathbf{x})\|_2^2, \quad \mathbf{z}^i \sim p_{\phi,\theta}(\mathbf{z}|\mathbf{x}^i). \quad (14)$$

898 where the parameters of  $p_{\phi,\theta}(\mathbf{z}|\mathbf{x})$  are suppressed in the update. Note that score matching generally  
899 requires computing the Hessian of the log density as in but in score-matching LEBM, we have  
900  $\nabla_{\mathbf{z}} \log p(\mathbf{z}|\mathbf{x}) = \nabla_{\mathbf{z}} \log p(\mathbf{x}|\mathbf{z}) + \nabla_{\mathbf{z}} \log p(\mathbf{z})$ .

901 **ED-LEBM.** Finally, the EBM prior can be learned by minimising the energy discrepancy between  
902 the posterior and the EBM prior with  $\tilde{E}_{\theta}(\mathbf{z}) := E_{\theta}(\mathbf{z}) - \log p_0(\mathbf{z})$ , which can be estimated as follows

$$\mathcal{L}_{\text{ED}}(\theta) := \frac{1}{N} \sum_{i=1}^N \log \left( \frac{w}{M} + \frac{1}{M} \sum_{j=1}^M \exp(\tilde{E}_{\theta}(\mathbf{z}^i) - \tilde{E}_{\theta}(\mathbf{z}^i + \sqrt{t}\boldsymbol{\xi}^i + \sqrt{t}\boldsymbol{\xi}^{t_{i,j}})) \right) \quad (15)$$

903 with  $\mathbf{z}^i \sim p_{\phi,\theta}(\mathbf{z}|\mathbf{x}^i)$ . Note that energy discrepancy does not require simulating MCMC sampling on  
904 the EBM prior and calculating the score of the log density, which is computationally friendly for  
905 large-scale training. It is critical to include the base distribution  $p_0(\mathbf{z})$  in the energy function  $\tilde{E}_{\theta}$ . We  
906 summarize the training process of the EBM prior using CD-, SM-, and ED-LEBM in Algorithms 1,  
907 2, and 3, with the training procedure of LEBM given in Algorithm 4.

| Algorithm 1 CD-LEBM                                                                                                        | Algorithm 2 SM-LEBM                                                                                                                                                  | Algorithm 3 ED-LEBM                                                                                                                                                                   |
|----------------------------------------------------------------------------------------------------------------------------|----------------------------------------------------------------------------------------------------------------------------------------------------------------------|---------------------------------------------------------------------------------------------------------------------------------------------------------------------------------------|
| 1: sample from posterior and prior<br>$\mathbf{z}_+ \sim p(\mathbf{z} \mathbf{x}); \mathbf{z}_- \sim p_\theta(\mathbf{z})$ | 1: sample from posterior<br>$\mathbf{z} \sim p(\mathbf{z} \mathbf{x})$                                                                                               | 1: sample from posterior<br>$\mathbf{z} \sim p(\mathbf{z} \mathbf{x})$                                                                                                                |
| 2: evaluate the energy difference<br>$d_\theta \leftarrow E_\theta(\mathbf{z}_+) - E_\theta(\mathbf{z}_-)$                 | 2: evaluate the score difference<br>$\mathbf{d}_\theta \leftarrow \nabla_{\mathbf{z}} \log p_\theta(\mathbf{z}) - \nabla_{\mathbf{z}} \log p(\mathbf{z} \mathbf{x})$ | 2: evaluate the energy difference<br>$d_\theta \leftarrow \frac{1}{M} \sum_{j=1}^M e^{\tilde{E}_\theta(\mathbf{z}) - \tilde{E}_\theta(\mathbf{z} + \sqrt{t}\xi + \sqrt{t}\xi\theta)}$ |
| 3: Update parameter $\theta$ using (13)<br>$\theta \leftarrow \theta - \eta_\theta \nabla_\theta d_\theta$                 | 3: Update parameter $\theta$ using (14)<br>$\theta \leftarrow \theta - \eta_\theta \nabla_\theta \frac{1}{2} \ \mathbf{d}_\theta\ _2^2$                              | 3: Update parameter $\theta$ using (15)<br>$\theta \leftarrow \theta - \eta_\theta \nabla_\theta \log(w/M + d_\theta)$                                                                |

Figure 9: The training procedure for the EBM prior. We use one training sample only to illustrate.

---

**Algorithm 4** Learning latent space energy-based prior models

---

- 1: **repeat**
  - 2: Sample training data points  $\{\mathbf{x}^i\}_{i=1}^N \sim p_{\text{data}}(\mathbf{x})$
  - 3: For each  $\mathbf{x}^i$ , sample the corresponding latent variable  $\mathbf{z}^i \sim p_{\phi, \theta}(\mathbf{z}|\mathbf{x}^i)$  via  
 $\mathbf{z}_{k+1}^i = \mathbf{z}_k^i + \frac{\epsilon}{2} \nabla_{\mathbf{z}} \log p_{\phi, \theta}(\mathbf{z}|\mathbf{x}^i) + \sqrt{\epsilon} \boldsymbol{\omega}_k, \quad \boldsymbol{\omega}_k \sim \mathcal{N}(0, \mathbf{I}), \mathbf{z}_0^i \sim p_0(\mathbf{z})$
  - 4: Update parameter  $\phi$  by maximizing log-likelihood  
 $\phi \leftarrow \phi + \eta_\phi \nabla_\phi \frac{1}{N} \sum_{i=1}^N \log p_\phi(\mathbf{z}^i|\mathbf{x}^i)$
  - 5: Update parameter  $\alpha$  by running Algorithms 1, 2, or 3  
 $\theta \leftarrow \theta - \eta_\theta \nabla_\theta \mathcal{L}_{\text{CD, SM, or ED}}(\theta)$
  - 6: **until** convergence of parameters  $(\phi, \theta)$
- 

## C.2 Langevin Sampling, Reconstruction, and Generation

To sample from the EBM prior  $p_\theta(\mathbf{z})$  and posterior  $p_{\phi, \theta}(\mathbf{z}|\mathbf{x})$  we employ a standard unadjusted Langevin sampling routine, i.e. we repeat for  $k = 0, 1, \dots, K$

$$\mathbf{z}_{k+1}^i = \mathbf{z}_k^i + \frac{\epsilon}{2} \nabla_{\mathbf{z}} \log p(\mathbf{z}) + \sqrt{\epsilon} \boldsymbol{\omega}_k, \quad \boldsymbol{\omega}_k \sim \mathcal{N}(0, \mathbf{I})$$

where  $\mathbf{z}_0 \sim p_0(\mathbf{z})$  and the distribution  $p(\mathbf{z})$  is replaced by the prior or posterior densities, respectively.

The generator is modelled as the Gaussian  $p_\phi(\mathbf{x}|\mathbf{z}) = \mathcal{N}(\mu_\phi(\mathbf{z}), \sigma^2 \mathbf{I})$ . In reconstruction of  $\mathbf{x}$ , we sample from the posterior  $\mathbf{z}_{\mathbf{x}} \sim p_{\phi, \theta}(\mathbf{z}|\mathbf{x})$  and compute the reconstruction as  $\hat{\mathbf{x}} = \mu_\phi(\mathbf{z}_{\mathbf{x}})$ . In data generation, we sample from the EBM prior  $\mathbf{z}_{\text{gen}} \sim p_\theta(\mathbf{z})$  and compute the generated synthetic data point as  $\mathbf{x}_{\text{gen}} = \mu_\phi(\mathbf{z}_{\text{gen}})$ .

## C.3 Experimental Details of LEBMs

**Datasets.** We use the following datasets in image modelling: SVHN (Netzer et al., 2011), CIFAR-10 (Krizhevsky et al., 2009), and CelebA (Liu et al., 2015). SVHN is of resolution  $32 \times 32$ , and contains 73,257 training images and 26,032 test images. CIFAR-10 consists of 50,000 training images and 10,000 test images with a resolution of  $32 \times 32$ . For CelebA, which contains 162,770 training images and 19,962 test images, we follow the pre-processing step in (Pang et al., 2020), taking 40,000 examples of CelebA as training data and resizing it to  $64 \times 64$ . In anomaly detection, we follow the setting in (Zenati et al., 2018) and the dataset can be found in their published code<sup>4</sup>.

**Model Architectures.** We adopt the same network architecture used in CD-LEBM (Pang et al., 2020), with the details depicted in Table 3, where  $\text{convT}(n)$  indicates a transposed convolutional operation with  $n$  output channels. We use Leaky ReLU as activation functions and the slope is set to be 0.2 and 0.1 in the generator and EBM prior, respectively.

**Details of Training and Inference.** Here, we provide a detailed description of the hyperparameters setup for ED-LEBM. Following (Pang et al., 2020), we utilise Xavier normal (Glorot & Bengio, 2010) to initialise the parameters. For the posterior sampling during training, we use the Langevin sampler with step size of 0.1 and run it for 20 steps for SVHN and CelebA, and 40 steps on CIFAR-10. We set  $t = 0.25$ ,  $M = 16$ ,  $w = 1$  throughout the experiments. The proposed models are trained for 200 epochs using the Adam optimizer (Kingma & Ba, 2014) with a fixed learning 0.0001 for the generator

<sup>4</sup><https://github.com/houssamzenati/Efficient-GAN-Anomaly-Detection>

Table 3: Model architectures of LEBMs on various datasets.

| (a) Generator for SVHN $32 \times 32$ , ngf = 64    |                 |        | (b) Generator for CIFAR-10 $32 \times 32$ , ngf = 128 |                 |        |
|-----------------------------------------------------|-----------------|--------|-------------------------------------------------------|-----------------|--------|
| Layers                                              | In-Out Size     | Stride | Layers                                                | In-Out Size     | Stride |
| Input: $\mathbf{x}$                                 | 1x1x100         | -      | Input: $\mathbf{x}$                                   | 1x1x128         | -      |
| 4x4 convT(ngf x 8), LReLU                           | 4x4x(ngf x 8)   | 1      | 8x8 convT(ngf x 8), LReLU                             | 8x8x(ngf x 8)   | 1      |
| 4x4 convT(ngf x 4), LReLU                           | 8x8x(ngf x 4)   | 2      | 4x4 convT(ngf x 4), LReLU                             | 16x16x(ngf x 4) | 2      |
| 4x4 convT(ngf x 2), LReLU                           | 16x16x(ngf x 2) | 2      | 4x4 convT(ngf x 2), LReLU                             | 32x32x(ngf x 2) | 2      |
| 4x4 convT(3), Tanh                                  | 32x32x3         | 2      | 3x3 convT(3), Tanh                                    | 32x32x3         | 1      |
| (c) Generator for CelebA $64 \times 64$ , ngf = 128 |                 |        | (d) Generator for MNIST $28 \times 28$ , ngf = 16     |                 |        |
| Layers                                              | In-Out Size     | Stride | Layers                                                | In-Out Size     | Stride |
| Input: $\mathbf{x}$                                 | 1x1x100         | -      | Input: $\mathbf{x}$                                   | 16              | -      |
| 4x4 convT(ngf x 8), LReLU                           | 4x4x(ngf x 8)   | 1      | 4x4 convT(ngf x 8), LReLU                             | 4x4x(ngf x 8)   | 1      |
| 4x4 convT(ngf x 4), LReLU                           | 8x8x(ngf x 4)   | 2      | 3x3 convT(ngf x 4), LReLU                             | 7x7x(ngf x 4)   | 2      |
| 4x4 convT(ngf x 2), LReLU                           | 16x16x(ngf x 2) | 2      | 4x4 convT(ngf x 2), LReLU                             | 14x14x(ngf x 2) | 2      |
| 4x4 convT(ngf x 1), LReLU                           | 32x32x(ngf x 1) | 2      | 4x4 convT(1), Tanh                                    | 28x28x1         | 2      |
| 4x4 convT(3), Tanh                                  | 64x64x3         | 2      |                                                       |                 |        |
| (e) EBM prior                                       |                 |        |                                                       |                 |        |
| Layers                                              | In-Out Size     |        |                                                       |                 |        |
| Input: $\mathbf{z}$                                 | 16/100/128      |        |                                                       |                 |        |
| Linear, LReLU                                       | 200             |        |                                                       |                 |        |
| Linear, LReLU                                       | 200             |        |                                                       |                 |        |
| Linear                                              | 1               |        |                                                       |                 |        |

and 0.00005 for the EBM prior. We choose the largest batch size from  $\{128, 256, 512\}$  such that it can be trained on a single NVIDIA-GeForce-RTX-2080-Ti GPU. In test time, we observed that slightly increasing the number of Langevin sampler steps can improve reconstruction performance. Therefore, we choose 100 steps with a step size of 0.1 for posterior sampling. Based on the insights gained from the MCMC diagnostic presented in Figure 18, we choose 500 steps with a step size of 0.2 to ensure convergence of the Langevin dynamics when sampling from the EBM prior.

**Evaluation Metrics.** In image modelling, we use FID and MSE to quantitatively evaluate the quality of the generated samples and reconstructed images. On all datasets the FID is computed based on 50,000 samples and the MSE is computed on the test set. Following (Zenati et al., 2018; Pang et al., 2020), we report the performance using AUPRC in anomaly detection and results are averaged over last 10 epochs to account for variance.

## D Additional Experimental Results

### D.1 Experimental Setup for Figure 1 (Healing the nearsightedness of score-matching)

A major problem of score-based methods is their nearsightedness, which refers to their inability to capture global properties of a distribution with disjoint supports such as the mixture weights of two well-separated modes (Zhang et al., 2022). In sight of Theorem 2, energy discrepancy should alleviate this problem as it implicitly compares the scores of both distributions at multiple noise-scales. Following Zhang et al. (2022), we investigate this by computing energy discrepancy as a function of the mixture weight  $\rho$  for the mixture of two Gaussians  $g_1 := \mathcal{N}(-5, 1)$  and  $g_2 := \mathcal{N}(5, 1)$ , i.e.,

$$p_\rho(x) = \rho g_1(x) + (1 - \rho) g_2(x).$$

where the true data has the mixture weight  $\rho = 0.2$ . We compare energy discrepancy  $\mathcal{L}_{t,M=32,w=1}(\rho) \approx \text{ED}(p_{\rho=0.2}, \log p_\rho)$  with the objective of maximum likelihood estimation

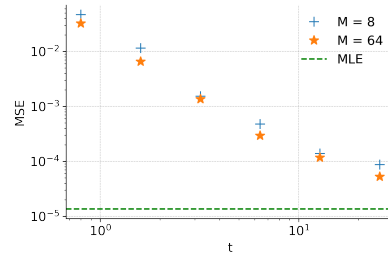

Figure 10: Study of the influence of  $t$  and  $M$  on estimating mixing weights.

MLE( $\rho$ ) :=  $\mathbb{E}_{p_{\rho=0.2}(x)}[-\log p_{\rho}(x)]$  and the score matching objective which here is given by the Fisher divergence  $\text{SM}(\rho) := \frac{1}{2}\mathbb{E}_{p_{\rho=0.2}(x)}[\|\nabla_x \log p_{\rho=0.2}(x) - \nabla_x p_{\rho}(x)\|_2^2]$ . The losses as functions of  $\rho$  are shown in Figure 1. We find that energy discrepancy is convex as a function of the mixture weight and approximates the negative log-likelihood as  $t$  increases. Consequently, energy discrepancy can capture the mixture weight well for sufficiently large values of  $t$ . SM, on the other hand, is a constant function and is blind to the value of the mixture weight.

To further investigate the impact of  $t$  and  $M$  on the efficiency of energy discrepancy, we minimise the energy discrepancy loss  $\mathcal{L}_{t,M=32,w=1}(\rho)$  as a function of the scalar parameter  $\rho$  for various choices of  $M$  and  $t$ . We compute the mean-square error of 50 independent estimated mixture weights for choice of  $t$  and  $M$ . As shown in Figure 10, the estimation performance approaches that of the maximum likelihood estimator as  $t$  increases, which verifies the statement in Theorem 2. Moreover, if the number of samples  $M$  used to estimate the contrastive potential is increased, the estimation performance can be further increased towards the mean-square error of the maximum-likelihood estimator.

## D.2 Experimental Setup for Figure 2 (Understanding the $w$ -stabilisation)

To probe our interpretation of the  $w$ -stabilisation, we train a neural-network to learn the energy function using 4,096 data points of a one-dimensional standard Gaussian  $p_{\text{data}}(x) \propto \exp(-x^2/2)$ . The neural network uses an input layer, a hidden linear layer of width two  $\mathbb{R}^2 \rightarrow \mathbb{R}^2$ , and a scalar output layer  $\mathbb{R}^2 \rightarrow \mathbb{R}$  with a Sigmoid Linear Unit activation between the layers. This neural network has sufficient capacity to model the Gaussian data as well as degenerate energy functions that illustrate potential pitfalls of energy discrepancy for  $w = 0$ . The energy discrepancy is set up with hyperparameters  $M = 4$ ,  $t = 1$ , and  $w \in \{0, 0.05, 0.25, 2\}$  and is trained for 50 epochs with Adam. Our results are shown in Figure 2 which confirms the relevance of the  $w$ -stabilisation to obtain a stable optimisation of energy discrepancy. We remark here that the degenerate case  $w = 0$  is not strictly reproducible. Different types of lacking smoothness of the energy-function at the edge of the support lead to diverging loss values. We chose a result that illustrates the best the theoretical exposition of the  $w$ -stabilisation in Appendix B.1 and refer to Figure 11 to reflect other malformed estimated energies as well as an example of a diverging loss history.

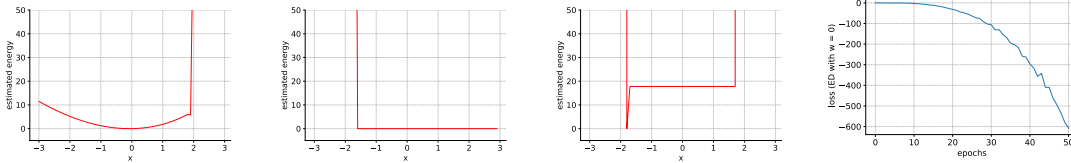

Figure 11: Potential outcomes for the estimated energy and loss history when ED does not converge with  $w = 0$

987

## D.3 Additional Density Estimation Results

Here, we provide additional details and results on the density estimation experiments.

**Details of Training and Inference.** Our choice for the energy-net for density estimation is a 4-layer feed-forward neural network with 128 hidden units and softplus activation function. In the context of energy discrepancy, we select  $t = 1$ ,  $M = 4$ , and  $w = 1$  as hyperparameters. For the contrastive divergence approach, we utilise CD-1, in which the gradient of the log-likelihood in Equation (1) is estimated by employing a Langevin sampler with a single step and a step size of 0.1. For score matching, we train EBMs using the explicit score matching in (2), where the Laplacian of the score is explicitly computed. We train the model using the Adam optimizer with a learning rate of 0.001 and iterations of 50,000. After training, synthesised samples are drawn by simulating Langevin dynamics with 100 steps and a step size of 0.1.

**Additional Experimental Results.** The additional results depicted in Figure 12 demonstrate the strong performance of energy discrepancy on various toy datasets, consistently yielding accurate



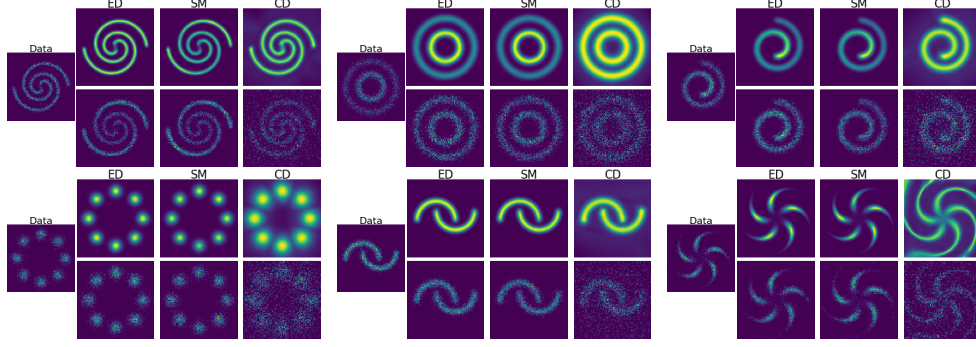

Figure 12: Additional results on density estimation.

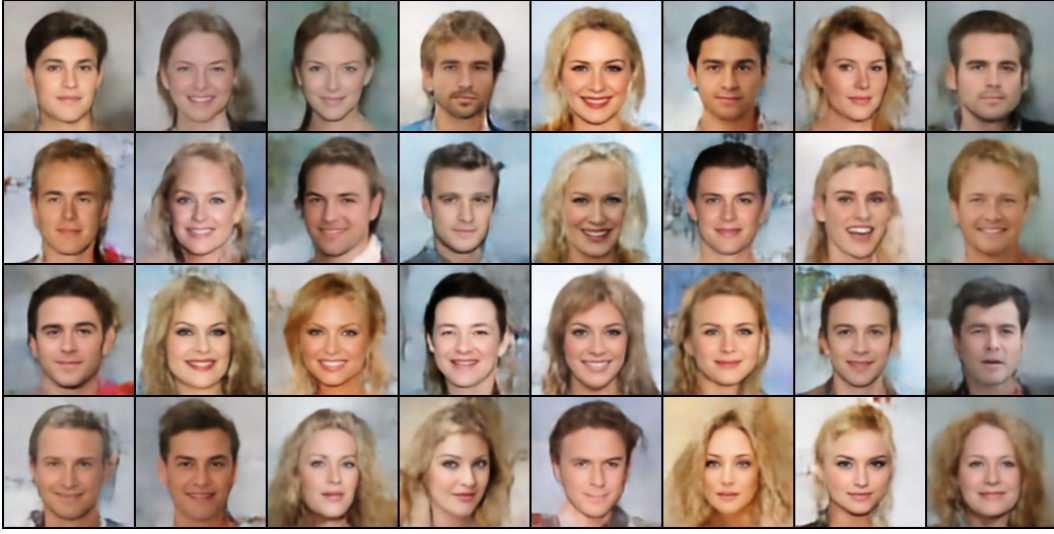

Figure 14: Generated images on CelebA  $128 \times 128$ .

energy landscapes. In contrast, contrastive divergence consistently produces flattened energy landscapes. Despite the success of score matching in these toy examples, score matching struggles to effectively learn distributions with disjoint support which can be seen in the results in Figure 3.

#### Comparison with Denoising Score Matching

We further compare energy discrepancy with denoising score matching (DSM) (Vincent, 2011). Specifically, we set  $w = 1, M = 4$  and experiment with various  $t$ . As shown in Figure 13, DSM fails to work when the noise scale is too large or too small. This is because DSM is a biased estimator which is optimised for  $p_{\theta^*}(\mathbf{y}) = \int \gamma_t(\mathbf{y} - \mathbf{x}) p_{\text{data}}(\mathbf{x}) d\mathbf{x}$ . In contrast, energy discrepancy is more robust to the choice of  $t$  since energy discrepancy considers all noise scales up to  $t$  simultaneously and has a unique optimum  $p_{\theta^*}(\mathbf{x}) = p_{\text{data}}(\mathbf{x})$ . However, in the case that  $t$  is large and  $M$  is small, estimation with energy discrepancy deteriorates due to high variance of the estimated loss function. This provides an explanation for the superior performance of energy discrepancy at  $\sqrt{t} = 1$  compared to  $\sqrt{t} = 10$ . Further ablation studies are presented in Figure 20.

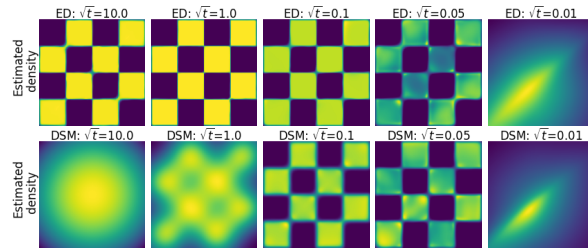

Figure 13: Comparing energy discrepancy (ED) with denoising score matching (DSM) with different noise scales.

## 1022 D.4 Additional Image Modelling Results

1023 **Additional Image Generation and Reconstruction Results.** Figures 14 and 15 show additional  
 1024 examples of image generation on CelebA  $128 \times 128$  and image reconstruction on CelebA  $64 \times 64$ .  
 1025 The images are computed through the sampling process outlined in Appendix C.2.

1026 **Additional Image Interpolation and Manipulation Results.** Figures 16, 17 and 19 show additional  
 1027 results of image interpolation and manipulation on CelebA  $64 \times 64$ . Note that there are two types  
 1028 of interpolations: posterior interpolation and prior interpolation. For posterior interpolation, we  
 1029 consider two real images  $\mathbf{x}_1$  and  $\mathbf{x}_2$  from the dataset and perform linear interpolation among their  
 1030 corresponding latent variables  $\mathbf{z}_1 \sim p_{\phi, \theta}(\mathbf{z}|\mathbf{x}_1)$  and  $\mathbf{z}_2 \sim p_{\phi, \theta}(\mathbf{z}|\mathbf{x}_2)$ . For prior interpolation, we  
 1031 apply linear interpolation between  $\mathbf{z}_1 \sim p_{\theta}(\mathbf{z})$  and  $\mathbf{z}_2 \sim p_{\theta}(\mathbf{z})$ .

1032 **Long-run MCMC Diagnostics.** Figure 18 depicts several convergence diagnostics for long-run  
 1033 MCMC on the EBM prior, where we simulate Langevin dynamics with a large number of steps  
 1034 (2,000). Firstly, the energy profiles converge at approximately 250 steps, as demonstrated in Fig-  
 1035 ure 18a, and the quality of the synthesized samples improves as the number of steps increases.  
 1036 Secondly, we compute the Gelman-Rubin statistic  $\hat{R}$  (Gelman & Rubin, 1992) using 64 chains. The  
 1037 histograms of  $\hat{R}$  over  $5,000 \times 64$  chains are shown in Figure 18b, with a mean of  $1.08 < 1.20$ , indicat-  
 1038 ing that the Langevin dynamics have approximately converged. Thirdly, we present auto-correlation  
 1039 results in Figure 18c using 5,000 chains, where the mean is depicted as a line and the standard  
 1040 deviation as bands. The auto-correlation decreases to zero within 200 steps, which is consistent with  
 1041 the Gelman-Rubin statistic that assesses convergence across multiple chains.

## 1042 D.5 Qualitative Results on the Effect of $t$ , $M$ , and $w$

1043 The hyperparameters  $t, M, w$  play important roles in energy discrepancy. Here, we provide some  
 1044 qualitative results to understand their effects. According to Theorem 2,  $t$  controls the nearsight-  
 1045 edness of energy discrepancy. For small  $t$ , energy discrepancy behaves like score matching  
 1046  $\frac{1}{t} \text{ED}_{\gamma_t}(p_{\text{data}}, U) = \frac{1}{t} \int_0^t \text{SM}(p_s, U_s) ds \approx \text{SM}(p_{\text{data}}, U)$  and is expected to be unable to resolve  
 1047 local mixture weights. This assertion can be confirmed by qualitative results depicted in Figure 20,  
 1048 which show that when  $t = 0.0025$ , energy discrepancy fails to identify the weights of components in  
 1049 the 25-Gaussians and pinwheel datasets. For large  $t$ , energy discrepancy inherits favourable properties  
 1050 of the maximum likelihood estimator. While large values of  $t$  consequently mitigate problems of  
 1051 nearsightedness, it is worth noting that energy discrepancy may encounter issues with high variance  
 1052 when  $t$  become excessively large. In such situations, it is necessary to consider increasing the value  
 1053 of  $M$  to reduce the variance.

1054 We also investigate the effect of  $w$  in Figure 21. As pointed out by the analysis in Appendix B.1,  
 1055  $w$  serves as a stabiliser training of energy based models with energy discrepancy. Based on our  
 1056 experimental observations, when  $w = 0$  and  $M$  is small (e.g.,  $M \leq 128$  in the 25-Gaussians dataset  
 1057 and  $M \leq 32$  in the pinwheel dataset), energy discrepancy exhibits rapid divergence within 100  
 1058 optimisation steps and fails to converge in the end. If, however,  $w$  is increased, e.g. to 1, energy  
 1059 discrepancy shows stable convergence even with  $M = 1$ . This property is highly appealing as it  
 1060 significantly reduces the computational complexity. Additionally, we find in Figure 2 that larger  
 1061  $w$  tends to result in a flatter estimated energy landscapes which aligns with our intuition gained in  
 1062 Appendix B.1.



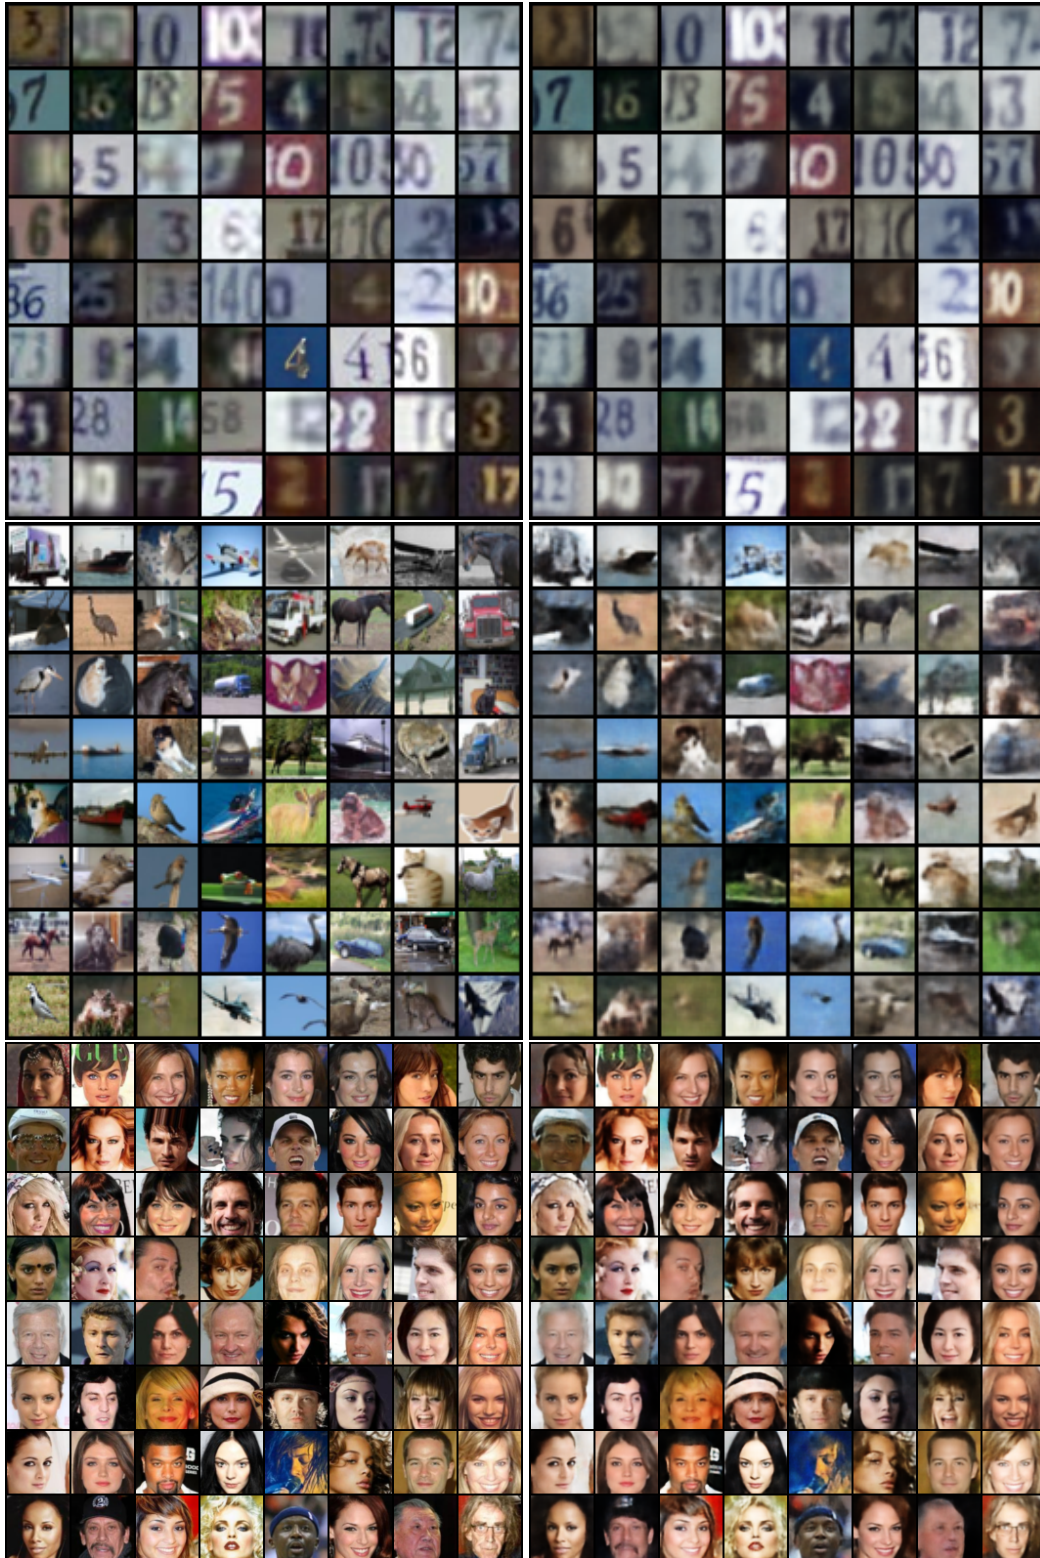

Figure 15: Qualitative results of reconstruction on test images. Left: real image from the dataset. Right: reconstructed images by sampling from the posterior.



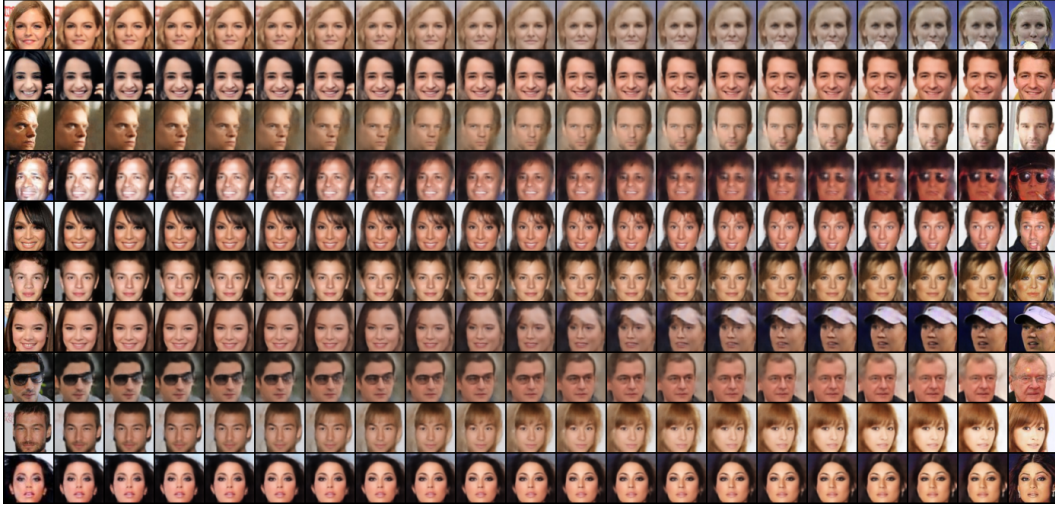

Figure 16: Linear interpolation results in posterior latent space between real images.

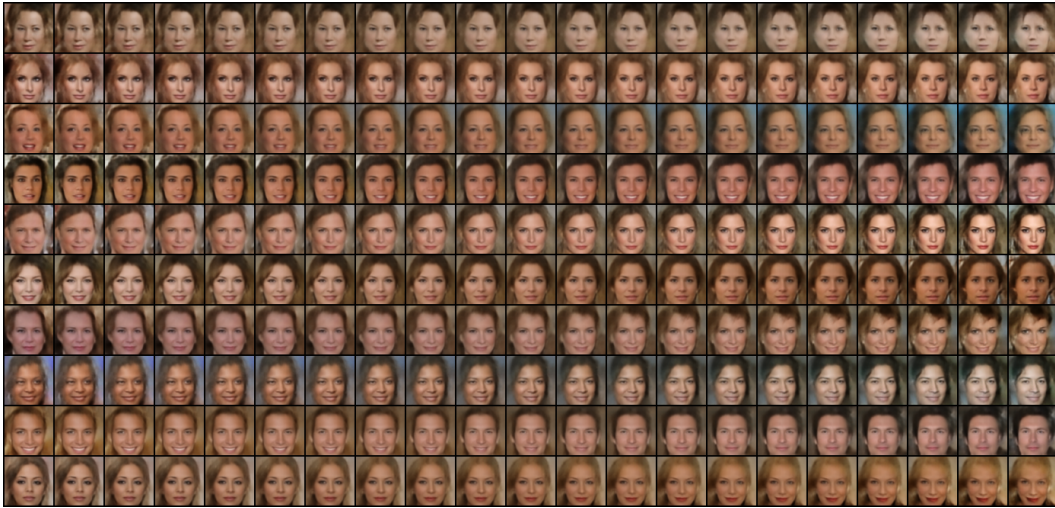

Figure 17: Linear interpolation results in prior latent space between generated images.

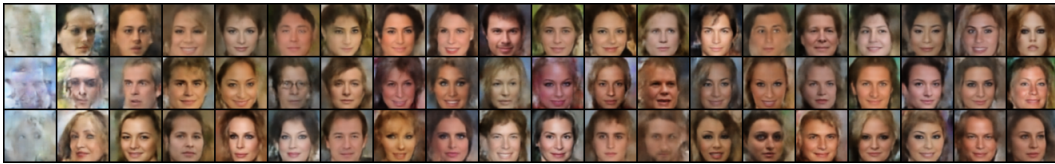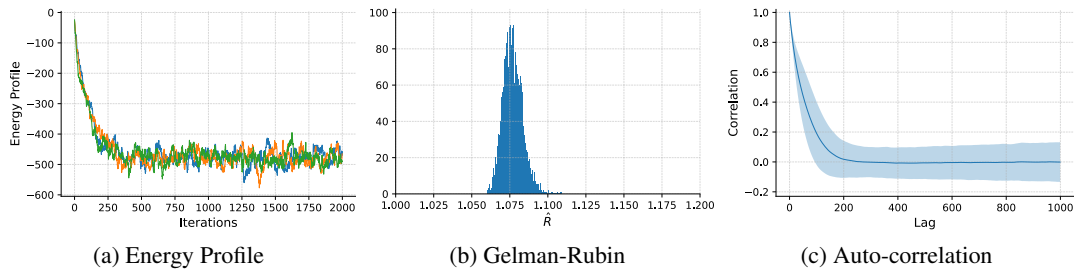

Figure 18: Diagnostics for the mixing of MCMC chains with 2,000 steps on CelebA  $64 \times 64$ . *Top:* Trajectory in the data space. *Bottom:* (a) Energy profile over time; (b) Histograms of Gelman-Rubin statistic of multiple chains; (c) Auto-correlation of a single chain over time lags.



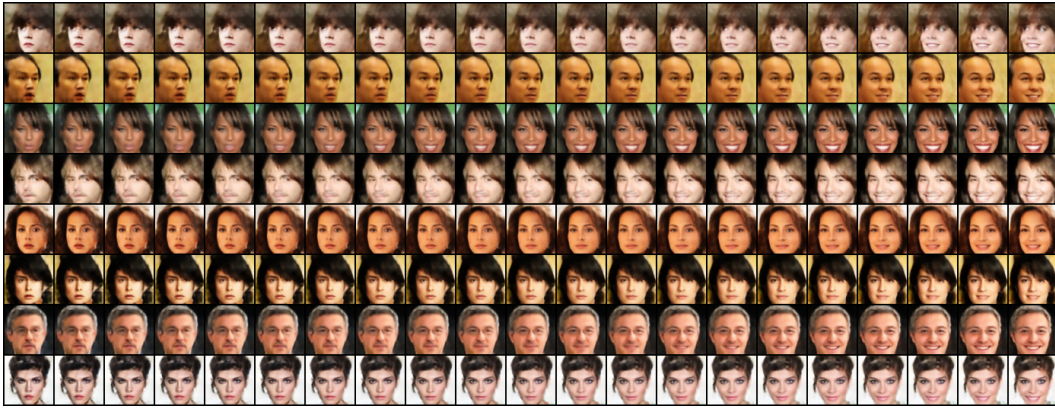

(a) Smiling

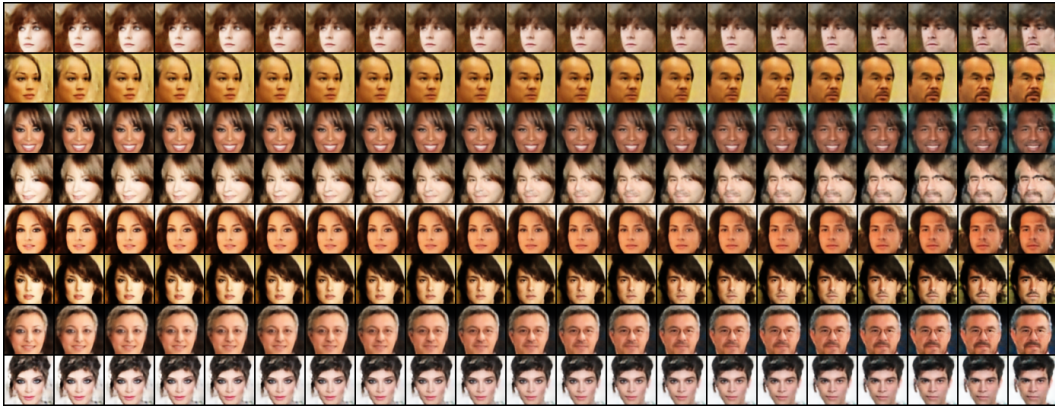

(b) Male

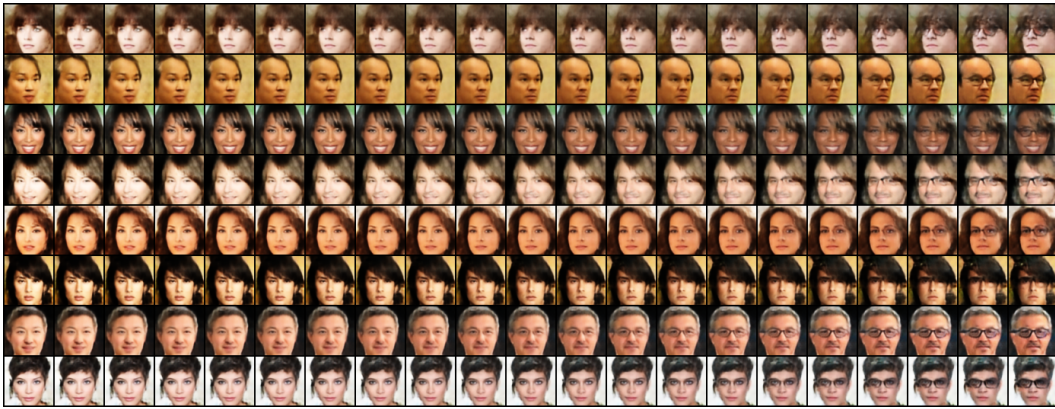

(c) Eyeglasses

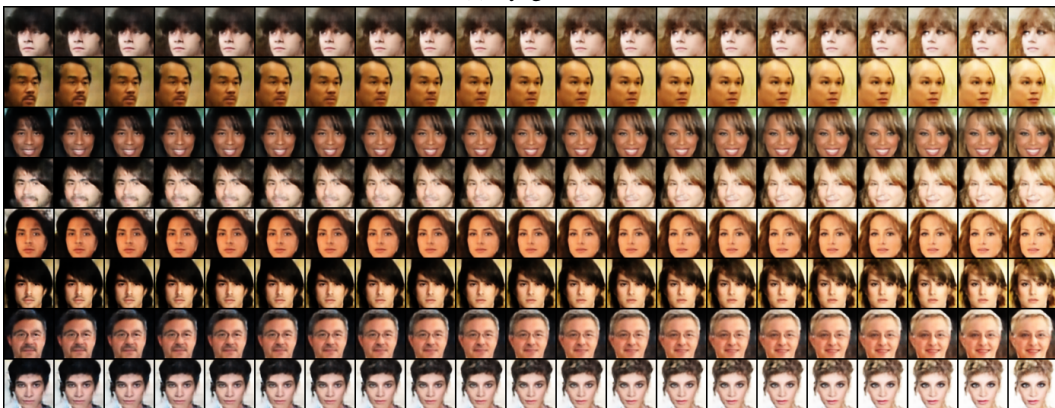

(d) Blond Hair

Figure 19: Attribute manipulation results on CelebA  $64 \times 64$ . Each row is made by interpolating the latent variable along an attribute vector, with the middle image being the original image.

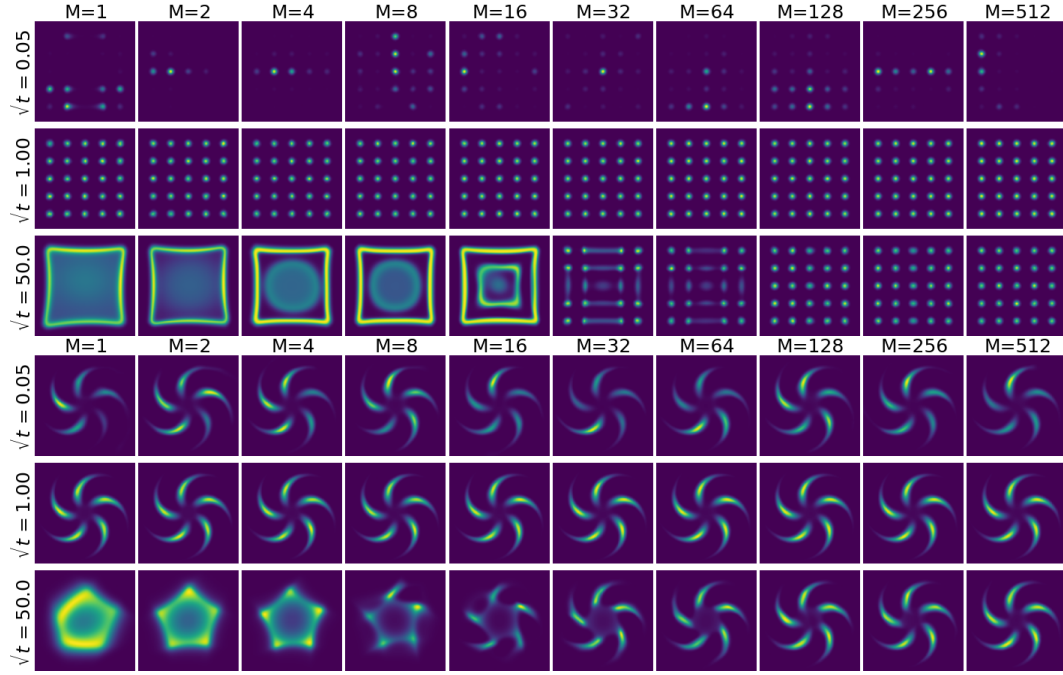

Figure 20: Density estimation on 25-Gaussians and pinwheel with different  $t$ ,  $M$  and  $w = 1$ .

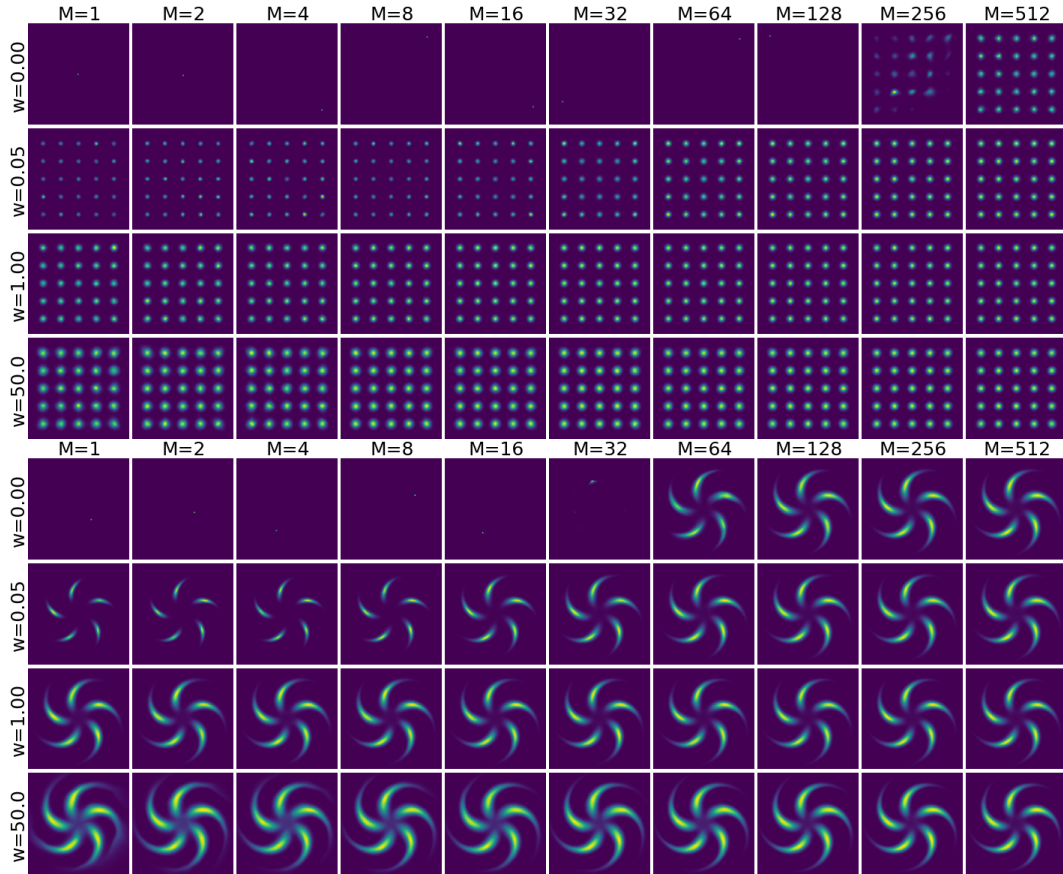

Figure 21: Density estimation 25-Gaussians and pinwheel with different  $w$ ,  $M$  and  $t = 1$ .
